# Supplementary material for: Identification by Automated Screening of a Small Molecule that Selectively Eliminates Neural Stem Cells Derived from hESCs but Not Dopamine Neurons
Source: PLoS One. 2009 Sep 23;4(9):e7155. doi: 10.1371/journal.pone.0007155 (PMC2743191; doi:10.1371/journal.pone.0007155)
Supplement: Table S1 — Gene expression analysis (4.55 MB XLS) [file pone.0007155.s001.xls]

## Sheet: TableControl_MZ_filtered_NSC_qn
Table S1: Gene expression analysis
ProbeID	TargetID	C.AVG_Signal	D.AVG_Signal	E.AVG_Signal	F.AVG_Signal	D/F	F/D	C/D
5860528	ACTB	26500	26500	26500	26500	1	1	1
1940161	TMSB4X	23800	23800	21300	21300	1.11737	0.894958	1
130424	ACTB	21300	21300	20400	19700	1.08122	0.924883	1
1070519	EEF1A1	20400	20400	23800	23800	0.857143	1.16667	1
4250487	RPS19	19700	19700	16500	18400	1.07065	0.93401	1
5900156	TUBA1B	18400	18400	17300	16500	1.11515	0.896739	1
2690379	EEF1A1	17300	17300	19700	20400	0.848039	1.17919	1
3190292	TAGLN	16500	16800	1500	2150	7.81395	0.127976	0.982143
6770246	EEF1A1	16800	16500	18400	17300	0.953757	1.04848	1.01818
50671	VIM	15900	15900	10500	12400	1.28226	0.779874	1
6620224	RPL6	14400	15200	12100	12600	1.20635	0.828947	0.947368
2810725	GNB2L1	13900	14400	10900	11200	1.28571	0.777778	0.965278
5960026	RPS29	15200	13900	13500	14400	0.965278	1.03597	1.09353
6480189	CRABP1	13100	13500	491	452	29.8673	0.0334815	0.97037
2060040	MYL6	13500	13100	9060	8560	1.53037	0.653435	1.03053
130768	RPS16	12400	12600	9320	8790	1.43345	0.697619	0.984127
2060477	GNAS	11200	12400	15900	15900	0.779874	1.28226	0.903226
6620465	RPL5	12600	12100	8900	9060	1.33554	0.74876	1.04132
6660220	RPS10	11800	11800	8560	9320	1.26609	0.789831	1
1990753	RPS29	12100	11600	10600	10900	1.06422	0.939655	1.0431
1570300	RPS20	11200	11200	6440	7010	1.59772	0.625893	1
6220136	TMSB10	10600	11200	12600	11200	1	1	0.946429
2320753	MYH10	11600	10900	4210	4430	2.4605	0.406422	1.06422
5700369	TUBA1A	9320	10700	16800	16800	0.636905	1.57009	0.871028
2650079	ACTB	10700	10600	7310	6950	1.52518	0.65566	1.00943
520161	TPT1	10500	10500	8610	8710	1.20551	0.829524	1
7210056	YWHAZ	10200	10200	8980	8980	1.13586	0.880392	1
1400132	RPS12	10900	9890	7290	7560	1.3082	0.764408	1.10212
4860215	RPS8	9580	9580	7560	7460	1.28418	0.778706	1
4900209	RPS6	9890	9320	5720	5960	1.56376	0.639485	1.06116
2320301	ITGB1	8560	9060	2420	2820	3.21277	0.311258	0.944812
1470176	TUBB2B	8790	8980	13900	13500	0.665185	1.50334	0.978842
4920730	H2AFZ	8480	8900	3150	3310	2.68882	0.37191	0.952809
1500437	RPL3	8340	8790	6740	7020	1.25214	0.798635	0.948805
1470646	RPL19	8610	8710	6320	6260	1.39137	0.718714	0.988519
2320403	RPL27	8900	8610	6350	6130	1.40457	0.711963	1.03368
7330341	GAPDH	8980	8560	5790	5460	1.56777	0.63785	1.04907
20072	ATP5EP2	8710	8480	7990	7990	1.06133	0.942217	1.02712
4590356	TUBB2A	7990	8410	13100	13100	0.641985	1.55767	0.950059
7560132	EIF4G2	8170	8340	8120	8080	1.03218	0.968825	0.979616
2970296	FSTL1	7390	8170	3150	4000	2.0425	0.489596	0.904529
1990762	CALM3	7290	8120	11800	10700	0.758879	1.31773	0.897783
60575	CDK2AP1	7310	8080	7390	8480	0.95283	1.0495	0.904703
5890307	H3F3A	9060	8060	7250	7130	1.13043	0.884615	1.12407
6400286	LOC646531	8120	7990	10700	7940	1.0063	0.993742	1.01627
2940639	RPL9	7940	7940	5690	5790	1.37133	0.729219	1
6370181	RPL11	7820	7820	4990	5120	1.52734	0.654731	1
4860086	MARCKSL1	7780	7780	8790	7670	1.01434	0.985861	1
2510086	AP2S1	7730	7730	6390	6650	1.16241	0.860285	1
6900367	MARCKS	7020	7670	8340	8900	0.861798	1.16037	0.915254
5490632	LOC650152	6870	7560	3200	3680	2.05435	0.486772	0.90873
1470408	YWHAQ	6650	7520	8170	8410	0.894174	1.11835	0.884309
2680653	ENO1	8060	7460	5160	4800	1.55417	0.643432	1.08043
4220563	LOC729466	7010	7390	6870	6790	1.08837	0.918809	0.948579
5890088	MRCL3	7560	7310	2070	2500	2.924	0.341997	1.0342
6580019	CCND1	6500	7290	820	900	8.1	0.123457	0.891632
6520497	ACTG1	5460	7250	4390	4730	1.53277	0.652414	0.753103
3830142	LOC731365	7460	7190	4800	4760	1.5105	0.662031	1.03755
2940767	OAZ1	6740	7130	6790	6180	1.15372	0.86676	0.945302
510632	TPM1	6910	7090	1180	1470	4.82313	0.207334	0.974612
3360133	RPS11	7520	7020	6500	7310	0.960328	1.04131	1.07123
2060154	CLEC2D	7670	7010	4900	5300	1.32264	0.756063	1.09415
3140066	CDKN1A	8410	6950	1940	2050	3.39024	0.294964	1.21007
2690487	RPS3	6830	6910	3570	3170	2.17981	0.458755	0.988423
2810113	LOC440589	6950	6870	5370	5280	1.30114	0.768559	1.01164
780458	ANP32B	7250	6830	2160	2340	2.9188	0.342606	1.06149
7650386	39700	7190	6790	3490	3780	1.7963	0.556701	1.05891
5490128	TUBA1C	5810	6740	1680	1840	3.66304	0.272997	0.862018
1070603	LOC728776	6180	6690	5320	5060	1.32213	0.756353	0.923767
2140243	COX4I1	6540	6650	6090	6540	1.01682	0.983459	0.983459
6380148	RPL8	7130	6600	4180	4040	1.63366	0.612121	1.0803
6270021	HNRPM	6410	6550	3000	2990	2.19064	0.456489	0.978626
5560328	PRDX1	6550	6540	5200	5370	1.21788	0.821101	1.00153
2680632	ODC1	6690	6500	2640	2510	2.58964	0.386154	1.02923
2120324	SOD1	6390	6440	6080	6440	1	1	0.992236
2570504	XRCC5	6440	6410	4430	4160	1.54087	0.648986	1.00468
3450673	CFL1	6320	6390	5160	5010	1.27545	0.784038	0.989045
2470187	SNRPG	6350	6350	3260	3670	1.73025	0.577953	1
240554	GNB1	6060	6320	7010	6830	0.925329	1.0807	0.958861
6350376	HSPA8	5490	6260	6540	5930	1.05565	0.947284	0.876997
7510672	RPS28	6600	6180	5590	6010	1.02829	0.972492	1.06796
2900592	RTN4	5960	6130	9890	10200	0.60098	1.66395	0.972268
4760682	ACTG2	6260	6090	623	1070	5.69159	0.175698	1.02791
6280333	MLLT11	5440	6080	12400	12100	0.502479	1.99013	0.894737
4810484	UBA52	6790	6060	4920	5510	1.09982	0.909241	1.12046
270451	NDUFA4	5550	6010	5490	5720	1.0507	0.951747	0.923461
2470168	LAMC1	5240	5960	693	817	7.29498	0.137081	0.879195
4920092	SLC2A3	5010	5930	1000	881	6.73099	0.148567	0.844857
1690605	RPS27L	5370	5910	2730	3150	1.87619	0.532995	0.908629
4230112	CALM2	4840	5850	6600	6740	0.867953	1.15214	0.82735
2760639	POLR2A	6130	5840	4380	4700	1.24255	0.804795	1.04966
5890196	IL18	3890	5810	7520	7290	0.796982	1.25473	0.669535
2350259	PSMB1	5590	5790	2760	2960	1.95608	0.511226	0.965458
4290243	MTCH1	5790	5720	5710	5570	1.02693	0.973776	1.01224
380682	JUND	8080	5710	11600	11800	0.483898	2.06655	1.41506
5910131	C15ORF51	3710	5690	7190	7520	0.756649	1.32162	0.652021
1050070	IGFBP5	4170	5660	1900	2440	2.31967	0.431095	0.736749
6380138	RCN1	5840	5640	3280	3280	1.71951	0.58156	1.03546
4570095	ATP5I	5720	5610	4730	4770	1.1761	0.850267	1.01961
4260048	TXN	4990	5590	4370	4390	1.27335	0.785331	0.892665
2640044	BASP1	4950	5570	15200	15200	0.366447	2.7289	0.888689
5670528	FTL	5710	5550	3350	3600	1.54167	0.648649	1.02883
1990500	DNCL1	5930	5540	6830	6320	0.876582	1.14079	1.0704
6620100	SCD	4620	5530	5460	5640	0.980496	1.01989	0.835443
4780376	CDH2	5040	5510	3930	4180	1.31818	0.758621	0.914701
2570731	MDK	6080	5490	1420	1540	3.56494	0.28051	1.10747
4860037	HMGCS1	4130	5470	6690	6690	0.817638	1.22303	0.755027
1450706	ATP5B	6090	5460	5510	5180	1.05405	0.948718	1.11538
5420538	GSTP1	6010	5440	2850	2710	2.00738	0.498162	1.10478
2680520	HNRPA2B1	5610	5390	4020	4130	1.30508	0.766234	1.04082
2100328	YWHAH	5180	5370	11200	11600	0.462931	2.16015	0.964618
6770653	DDX5	4760	5320	4860	4870	1.0924	0.915414	0.894737
1470450	FST	4380	5300	166	188	28.1915	0.0354717	0.826415
6480170	MAGED1	5910	5280	7780	7730	0.683053	1.46402	1.11932
580435	EIF1	7090	5270	5300	4840	1.08884	0.918406	1.34535
3870095	RPS24	5640	5260	5130	4950	1.06263	0.941065	1.07224
160390	TEGT	5020	5240	5930	5470	0.957952	1.04389	0.958015
3130300	ATP5A1	5100	5200	5910	6080	0.855263	1.16923	0.980769
1580156	FBN2	5270	5180	250	354	14.6328	0.0683398	1.01737
7550537	SLC25A5	5850	5160	4290	4260	1.21127	0.825581	1.13372
7380019	PABPC1	4910	5160	2750	2760	1.86957	0.534884	0.95155
5390487	MATR3	4980	5130	6180	6550	0.783206	1.2768	0.97076
6520008	HSP90AA1	4860	5120	5280	5590	0.915921	1.0918	0.949219
150630	ANXA1	5200	5100	796	1110	4.59459	0.217647	1.01961
5690008	SAE1	5570	5090	2960	2820	1.80496	0.554028	1.0943
7150711	SFRS6	5510	5070	4790	4650	1.09032	0.91716	1.08679
270050	HNRNPC	5120	5060	3470	3040	1.66447	0.600791	1.01186
6660193	RPL4	5090	5060	3760	2870	1.76307	0.567194	1.00593
2710368	CALD1	4770	5040	1110	1450	3.47586	0.287698	0.946429
5490273	CD81	5320	5020	5440	5550	0.904505	1.10558	1.05976
830047	TXNDC17	4640	5010	2280	2590	1.93436	0.516966	0.926148
3190193	RPL30	5300	4990	3720	4270	1.16862	0.855711	1.06212
1190274	LOC441775	5160	4980	3740	3620	1.37569	0.726908	1.03614
1570129	COX5A	5160	4970	4500	4480	1.10938	0.901408	1.03823
2970768	EIF4A1	5060	4950	2930	2830	1.74912	0.571717	1.02222
1010301	DYNC1H1	4790	4930	7020	7090	0.695346	1.43813	0.971602
610370	ATP5O	5390	4920	4700	4900	1.00408	0.995935	1.09553
1190575	CCND2	3880	4920	1580	1650	2.98182	0.335366	0.788618
7330129	HINT1	4900	4910	4980	5020	0.978088	1.0224	0.997963
1050474	RPS13	5540	4900	4720	4920	0.995935	1.00408	1.13061
1500768	DPYSL2	4610	4890	7820	8340	0.586331	1.70552	0.94274
4390136	C21ORF55	4000	4870	6950	6390	0.762128	1.31211	0.821355
5490601	PPP2CA	4930	4860	4450	4500	1.08	0.925926	1.0144
3450554	HSP90B1	5470	4840	2410	2510	1.92829	0.518595	1.13017
7050167	EIF3E	4920	4820	3070	3310	1.45619	0.686722	1.02075
7610189	RPL12	5260	4800	3240	3380	1.42012	0.704167	1.09583
5130082	HSP90AB1	4970	4790	4050	3700	1.29459	0.772443	1.03758
6290239	MCM7	4800	4770	1070	1030	4.63107	0.215933	1.00629
3450184	RPLP2	5530	4760	4970	4420	1.07692	0.928571	1.16176
3190711	SPRY1	4820	4730	880	960	4.92708	0.20296	1.01903
5220564	AMY1C	4270	4720	4110	3830	1.23238	0.811441	0.904661
1090136	PPP1R14B	4870	4700	4700	4150	1.13253	0.882979	1.03617
1990070	HNRNPAB	4370	4700	3040	3080	1.52597	0.655319	0.929787
5050537	PSMC1	5660	4650	3400	3880	1.19845	0.834409	1.2172
4260128	HDAC2	4580	4640	3620	3510	1.32194	0.756466	0.987069
7400703	EEF1B2	4480	4620	3200	3210	1.43925	0.694805	0.969697
1170743	ATF4	5690	4610	3340	3070	1.50163	0.665944	1.23427
1500762	LDHA	3990	4580	1280	1490	3.07383	0.325328	0.871179
2600753	MAPRE1	4500	4560	4840	5070	0.899408	1.11184	0.986842
2850156	TUBB3	4320	4540	8480	9580	0.473904	2.11013	0.951542
1260682	HNRNPD	4380	4530	2340	2610	1.73563	0.576159	0.966887
2640519	COL4A1	3560	4510	2180	2300	1.96087	0.509978	0.789357
6840039	VCL	4450	4500	2280	2280	1.97368	0.506667	0.988889
5490563	SFRS9	4560	4480	3240	3060	1.46405	0.683036	1.01786
1170553	PTBP1	4890	4460	1690	1700	2.62353	0.381166	1.09641
6110386	C17ORF45	5280	4450	4820	4790	0.929019	1.0764	1.18652
3290630	MYH9	4020	4430	815	926	4.78402	0.209029	0.907449
7200114	CTGF	4920	4420	663	872	5.06881	0.197285	1.11312
130753	CNN3	4460	4390	4610	4620	0.950216	1.05239	1.01595
3360576	MRLC2	4510	4380	3560	3370	1.2997	0.769406	1.02968
1300634	NDUFS6	4190	4380	3070	3360	1.30357	0.767123	0.956621
1300739	LOC645317	4530	4370	3620	3940	1.10914	0.901602	1.03661
2260047	NES	4650	4340	2350	2150	2.0186	0.495392	1.07143
5050398	RPL36	5060	4320	2870	2920	1.47945	0.675926	1.1713
3450017	ARPC2	4390	4300	3530	3660	1.17486	0.851163	1.02093
3520678	HSPD1	3760	4290	2930	2870	1.49477	0.668998	0.876457
3130437	RPS14	4700	4270	3010	3180	1.34277	0.744731	1.1007
2650382	SF3B2	4720	4260	5060	4700	0.906383	1.10329	1.10798
2750626	EEF2	5070	4240	4910	4890	0.867076	1.1533	1.19575
3170438	PAICS	4300	4210	2150	2350	1.79149	0.558195	1.02138
2900711	EIF4A2	4700	4190	6910	6910	0.606368	1.64916	1.12172
6370041	TTC3	4210	4180	11200	10600	0.39434	2.53589	1.00718
7160753	PFN2	3620	4170	5040	5160	0.80814	1.23741	0.868106
5310228	ZMIZ1	4110	4160	7670	7250	0.573793	1.74279	0.987981
7200367	GNG11	3910	4150	1070	1340	3.09701	0.322892	0.942169
1770379	VDAC2	4260	4130	2830	2810	1.46975	0.680387	1.03148
6510487	PCBP1	3940	4130	3810	3690	1.11924	0.893462	0.953995
4890743	WDR1	3470	4110	3770	3530	1.16431	0.858881	0.844282
6860403	RHOA	3930	4080	3220	3240	1.25926	0.794118	0.963235
4590008	TSC22D1	4420	4050	6060	5810	0.697074	1.43457	1.09136
6480010	RPL15	3740	4040	7730	7390	0.546685	1.82921	0.925743
3060154	STARD7	4180	4020	4320	4370	0.919908	1.08706	1.0398
1940634	CAP1	4010	4010	2310	2180	1.83945	0.543641	1
4540600	SFRS1	3960	4000	2180	2110	1.89573	0.5275	0.99
2230296	SET	4150	3990	2860	2900	1.37586	0.726817	1.0401
7400121	DDB1	3980	3980	3580	3620	1.09945	0.909548	1
360692	CCT8	3770	3960	2510	2670	1.48315	0.674242	0.95202
3800612	RPS25	4130	3950	3460	3950	1	1	1.04557
4180142	EIF3EIP	4540	3940	4160	3760	1.04787	0.954315	1.15228
3870427	CYB5B	3400	3940	3120	3200	1.23125	0.812183	0.862944
4290326	PPP2R1A	3830	3930	4560	4540	0.865639	1.15522	0.974555
3290605	TOMM7	3880	3920	4930	5260	0.745247	1.34184	0.989796
3170743	SFRS2	3560	3910	3040	2610	1.49808	0.667519	0.910486
290452	TPM2	4050	3890	356	486	8.00412	0.124936	1.04113
7160390	GAPDH	3920	3880	2440	2120	1.83019	0.546392	1.01031
430338	ACTA2	3050	3880	2280	2960	1.31081	0.762887	0.786082
1010398	FASN	5130	3870	4300	4210	0.91924	1.08786	1.32558
6350360	ATP5G2	4290	3850	1430	1480	2.60135	0.384416	1.11429
4850767	RPS3A	4240	3830	3520	3200	1.19687	0.835509	1.10705
3780646	CCT2	3830	3830	2600	2570	1.49027	0.671018	1
50156	LAMP1	3870	3810	4920	4720	0.807203	1.23885	1.01575
4780743	EWSR1	3610	3790	3550	3740	1.01337	0.986807	0.952507
5550100	FSCN1	4040	3780	3260	3740	1.0107	0.989418	1.06878
1010402	MGEA5	3740	3770	4240	3770	1	1	0.992042
4260333	SMS	3510	3760	2390	2420	1.55372	0.643617	0.933511
3870056	COL5A2	3430	3760	1030	1380	2.72464	0.367021	0.912234
150066	HNRPR	3680	3740	2960	3000	1.24667	0.802139	0.983957
1500241	SPP1	3450	3740	196	203	18.4236	0.0542781	0.92246
2490364	TMEM97	3530	3720	2750	2420	1.53719	0.650538	0.948925
3130056	TIMM23	3850	3710	3180	3390	1.0944	0.913747	1.03774
5550309	PARP1	3700	3700	2110	2190	1.6895	0.591892	1
3180437	GLRX5	3490	3700	2900	3140	1.17834	0.848649	0.943243
1030121	DBI	3220	3690	5550	5850	0.630769	1.58537	0.872629
360114	NME1	3620	3680	2140	1970	1.86802	0.535326	0.983696
4540414	RPS18	4430	3670	2200	2380	1.54202	0.648501	1.20708
4210221	SH3BP4	2990	3670	971	1090	3.36697	0.297003	0.814714
1660709	C20ORF30	3380	3660	3760	3890	0.940874	1.06284	0.923497
6130725	C5ORF13	2880	3640	7940	7780	0.467866	2.13736	0.791209
4260379	STMN3	3590	3620	7130	7190	0.503477	1.98619	0.991713
2760121	COL1A2	3150	3620	2830	3520	1.02841	0.972376	0.870166
6760326	SPARC	3540	3610	1950	2180	1.65596	0.603878	0.980609
2970537	LOC285053	4340	3600	2370	2270	1.5859	0.630556	1.20556
6960240	PSAP	4080	3590	5270	5390	0.666048	1.50139	1.13649
6290324	RCN2	3460	3580	3090	3120	1.14744	0.871508	0.96648
630706	POMP	3600	3570	2620	2840	1.25704	0.795518	1.0084
4860402	TMEM66	3670	3560	8060	8170	0.435741	2.29494	1.0309
7400431	ILF2	3640	3560	2580	2390	1.48954	0.671348	1.02247
1090682	SARS	3940	3550	2260	2230	1.59193	0.628169	1.10986
4540468	G3BP1	3120	3540	2220	2430	1.45679	0.686441	0.881356
1300056	NDUFB2	3520	3530	3200	3210	1.09969	0.909348	0.997167
60707	ADD1	3360	3530	4510	4450	0.793258	1.26062	0.951841
6660450	ATP5F1	3280	3520	3380	3560	0.988764	1.01136	0.931818
3310670	RPS9	3950	3510	2360	2220	1.58108	0.632479	1.12536
5360082	CSRP2	3130	3490	2230	2790	1.2509	0.799427	0.896848
630176	UQCRQ	3200	3480	3130	3470	1.00288	0.997126	0.91954
3170092	GLTSCR2	3670	3470	2760	2860	1.21329	0.824207	1.05764
780356	RPS15A	3530	3470	2200	2450	1.41633	0.706052	1.01729
450022	KPNB1	3300	3470	1490	1630	2.12883	0.469741	0.951009
4050181	LOC647340	3200	3460	3470	3400	1.01765	0.982659	0.924855
2140523	SMARCC1	3330	3450	1040	1120	3.08036	0.324638	0.965217
670692	RPL38	3760	3440	2650	3010	1.14286	0.875	1.09302
1850435	CTNNA1	3140	3430	3120	3110	1.10289	0.906706	0.915452
5310201	CSDA	3410	3420	1010	1070	3.19626	0.312865	0.997076
3310494	NGRN	3150	3410	5840	5710	0.597198	1.67449	0.923754
2360348	PHGDH	4160	3400	1040	1120	3.03571	0.329412	1.22353
4490026	LOC646766	3550	3400	1870	1890	1.79894	0.555882	1.04412
5960343	C11ORF10	3780	3390	2440	2620	1.29389	0.772861	1.11504
6330369	NUCB1	3660	3380	3700	4510	0.749446	1.33432	1.08284
6420735	COX7A2	3170	3380	3110	3450	0.97971	1.02071	0.93787
6590703	GARS	3470	3370	2140	1900	1.77368	0.563798	1.02967
2370347	VDAC3	3070	3370	4890	4460	0.755605	1.32344	0.910979
6270020	TPM2	3340	3360	388	494	6.80162	0.147024	0.994048
6270747	CCNI	3320	3360	5960	5840	0.575342	1.7381	0.988095
2680682	PDLIM7	3480	3350	1370	1370	2.44526	0.408955	1.03881
5080156	ATP5H	3000	3350	2970	3270	1.02446	0.976119	0.895522
4560497	HSPA9	3570	3340	2700	2340	1.42735	0.700599	1.06886
1850047	CTXN1	3720	3330	6260	6600	0.504545	1.98198	1.11712
7050091	TBCA	3470	3320	3880	3980	0.834171	1.1988	1.04518
1710021	CDC20	3310	3310	274	336	9.85119	0.101511	1
1770593	MRFAP1	3220	3310	3850	3240	1.0216	0.978852	0.97281
5490376	ZNF428	3360	3300	5100	4990	0.661323	1.51212	1.01818
6650333	MRPS6	3280	3280	2840	2890	1.13495	0.881098	1
3710324	LOC441087	1540	3280	5640	5530	0.593128	1.68598	0.469512
2450575	ACAT2	2480	3270	2300	2180	1.5	0.666667	0.75841
4040609	LDHB	3150	3260	2170	2230	1.46188	0.684049	0.966258
6060754	PTK2	3110	3260	2200	2270	1.43612	0.696319	0.953988
4180082	EWSR1	3310	3240	2080	2080	1.55769	0.641975	1.0216
110707	ARL6IP1	3260	3240	3410	3720	0.870968	1.14815	1.00617
2350300	CNN2	2830	3230	690	685	4.71533	0.212074	0.876161
1470253	DDX17	3120	3220	4760	4930	0.653144	1.53106	0.968944
580376	39693	2950	3220	2720	2900	1.11034	0.900621	0.916149
3840390	PARK7	2930	3210	2990	2960	1.08446	0.922118	0.912773
3190519	SORBS2	2850	3210	829	814	3.94349	0.253583	0.88785
830762	TXN	3130	3200	2540	2470	1.29555	0.771875	0.978125
5290470	MORF4L1	2960	3200	3450	4080	0.784314	1.275	0.925
5890707	ITGB1	2800	3200	548	588	5.44218	0.18375	0.875
3180075	RPS4Y1	3170	3180	1370	1270	2.50394	0.399371	0.996855
290669	LOC650369	3370	3170	668	642	4.93769	0.202524	1.06309
2570369	H2AFY2	2920	3170	2530	2720	1.16544	0.858044	0.921136
6860358	NDUFAB1	3090	3160	2790	2940	1.07483	0.93038	0.977848
7000343	RBPJ	3390	3150	3320	3370	0.934718	1.06984	1.07619
4260731	LPP	3210	3150	728	953	3.30535	0.30254	1.01905
6450706	PRDX6	3120	3150	1140	1250	2.52	0.396825	0.990476
4760487	PGRMC1	2890	3140	4620	4380	0.716895	1.3949	0.920382
4180369	TMEM158	3180	3130	5530	5910	0.529611	1.88818	1.01597
2370673	CD99	2760	3130	2920	3260	0.960123	1.04153	0.881789
2570538	CIP29	3260	3120	2150	2110	1.47867	0.676282	1.04487
7320403	PROM1	2880	3120	969	1220	2.55738	0.391026	0.923077
1580181	TKT	2840	3120	1570	1370	2.27737	0.439103	0.910256
50538	ENY2	2970	3110	1170	1280	2.42969	0.411576	0.954984
1450246	PCBP2	3700	3100	2830	2540	1.22047	0.819355	1.19355
1660537	MORF4L2	3030	3090	2970	3030	1.0198	0.980583	0.980583
6660129	LBR	2640	3090	1560	1500	2.06	0.485437	0.854369
10672	FAT	3420	3080	2370	2700	1.14074	0.876623	1.11039
4280326	RPS5	3240	3070	2400	2230	1.37668	0.726384	1.05537
4490273	AZIN1	3210	3070	3470	3530	0.869688	1.14984	1.0456
610408	PPP4R1	3080	3070	2510	2700	1.13704	0.879479	1.00326
5690563	NCKAP1	3370	3060	3960	4110	0.744526	1.34314	1.10131
1190278	FKSG30	3000	3050	1950	1850	1.64865	0.606557	0.983607
430324	PTOV1	3240	3040	4260	4340	0.700461	1.42763	1.06579
1230743	DCTN2	2890	3040	3310	3200	0.95	1.05263	0.950658
3170041	C7ORF50	3380	3030	2310	2310	1.31169	0.762376	1.11551
7610639	BTBD2	3230	3030	4340	4290	0.706294	1.41584	1.06601
1190647	APEX1	2770	3020	2250	2240	1.34821	0.741722	0.917219
7150221	CKB	3200	3010	3600	3610	0.833795	1.19934	1.06312
580725	LARP1	2980	3000	3270	3340	0.898204	1.11333	0.993333
4860619	MRPL51	2960	3000	1490	1500	2	0.5	0.986667
1780187	ZFAND5	3020	2990	3680	3700	0.808108	1.23746	1.01003
20427	PPP1CC	2820	2980	1920	1990	1.49749	0.667785	0.946309
5810025	YARS	3400	2970	1880	1840	1.61413	0.619529	1.14478
510328	CCDC72	3040	2970	1610	1710	1.73684	0.575758	1.02357
5960328	DAD1	2870	2960	2340	2580	1.14729	0.871622	0.969595
4540554	PCNA	2570	2960	927	986	3.00203	0.333108	0.868243
4780008	IGFBP7	2340	2960	487	782	3.78517	0.264189	0.790541
6130241	GDI2	3270	2950	1700	1590	1.85535	0.538983	1.10847
2900672	TOMM20	3040	2950	2120	2400	1.22917	0.813559	1.03051
4180474	JAM3	2640	2940	1850	1820	1.61538	0.619048	0.897959
4390682	ATP5H	2480	2940	2390	2730	1.07692	0.928571	0.843537
6660544	PJA2	3090	2930	5060	5490	0.533698	1.87372	1.05461
3940142	C14ORF156	3030	2930	1680	1940	1.51031	0.662116	1.03413
5890241	HNRNPA0	2310	2930	3560	3470	0.84438	1.1843	0.788396
4250398	HIST1H4C	3350	2920	1480	1570	1.85987	0.537671	1.14726
6200053	TOP2B	2490	2920	3230	3350	0.871642	1.14726	0.85274
5490687	DARS	3070	2900	2630	2770	1.04693	0.955172	1.05862
7650672	NOLA3	2720	2900	1930	2010	1.44279	0.693103	0.937931
270164	CKS1B	2950	2890	266	290	9.96552	0.100346	1.02076
5820358	DBN1	2790	2890	2370	2290	1.26201	0.792388	0.965398
3830047	SNX3	2800	2880	3790	3930	0.732824	1.36458	0.972222
110152	EIF4A3	2720	2880	2000	1780	1.61798	0.618056	0.944444
130382	LASP1	2710	2880	1690	1570	1.83439	0.545139	0.940972
4220132	BUB3	2830	2870	1860	1880	1.5266	0.655052	0.986063
2690402	ATP2A2	2560	2870	4010	3880	0.739691	1.35192	0.891986
2900121	ARMET	3810	2860	1570	1870	1.52941	0.653846	1.33217
4070164	COX7C	2610	2860	3830	3790	0.754617	1.32517	0.912587
7570603	RAB31	2520	2850	928	1020	2.79412	0.357895	0.884211
3420315	MAT2A	2230	2850	2980	3070	0.928339	1.07719	0.782456
780673	CS	2850	2840	2840	2670	1.06367	0.940141	1.00352
7570411	CCNG1	2550	2840	1130	1260	2.25397	0.443662	0.897887
6450767	TNFRSF10B	3010	2830	596	594	4.76431	0.209894	1.0636
1820373	TRAM1	2840	2830	2110	2090	1.35407	0.738516	1.00353
6330672	ANXA5	2790	2830	1770	1670	1.69461	0.590106	0.985866
2060347	EVL	2960	2820	6550	6410	0.439938	2.27305	1.04965
3290343	LAPTM4B	2590	2820	3950	3960	0.712121	1.40426	0.91844
6900343	NDUFB8	2940	2810	3000	3160	0.889241	1.12456	1.04626
4640132	MIF	3350	2800	2900	3360	0.833333	1.2	1.19643
6520594	ARHGDIA	2900	2800	1640	1740	1.6092	0.621429	1.03571
730471	SUPT16H	2810	2790	1680	1630	1.71166	0.584229	1.00717
3180491	SYNCRIP	2740	2790	1860	1880	1.48404	0.673835	0.982079
1340689	DSTN	2310	2790	2520	2080	1.34135	0.74552	0.827957
7200706	BAT1	2790	2770	2060	2070	1.33816	0.747292	1.00722
1980240	FERMT2	2700	2770	1420	1470	1.88435	0.530686	0.974729
5570296	SSRP1	2580	2770	1650	1560	1.77564	0.563177	0.931408
3310253	ASNS	3690	2760	1340	1270	2.17323	0.460145	1.33696
7650193	CSE1L	2690	2760	1190	1190	2.31933	0.431159	0.974638
2070315	SHC1	2520	2760	424	401	6.88279	0.14529	0.913043
7050121	DDX1	2770	2750	2160	2170	1.26728	0.789091	1.00727
1230494	HMGCR	2100	2750	3640	3030	0.907591	1.10182	0.763636
1780035	CALM1	2690	2740	7090	6870	0.398836	2.5073	0.981752
1050017	BCLAF1	2670	2740	2380	2320	1.18103	0.846715	0.974453
2810402	ARGLU1	2970	2730	3330	3330	0.81982	1.21978	1.08791
6560482	CIRBP	2660	2730	3420	3300	0.827273	1.20879	0.974359
2900450	PUNC	2400	2730	296	267	10.2247	0.0978022	0.879121
2370170	IMMT	2880	2720	2010	2070	1.31401	0.761029	1.05882
2900386	WBP2	2730	2720	5240	5090	0.534381	1.87132	1.00368
3440056	COX8A	2700	2710	1800	1720	1.57558	0.634686	0.99631
2600605	STOML2	2730	2700	1770	1690	1.59763	0.625926	1.01111
840615	GLUD1	2630	2700	3830	3560	0.758427	1.31852	0.974074
7380671	TBCB	2650	2690	2870	2580	1.04264	0.959108	0.98513
7040475	NDUFS3	2640	2690	2300	2490	1.08032	0.925651	0.981413
4860551	METAP2	2610	2690	2060	2200	1.22273	0.817844	0.97026
2900593	PFDN5	2620	2680	3670	3420	0.783626	1.27612	0.977612
4760551	ATP6V1B2	2830	2670	3080	2970	0.89899	1.11236	1.05993
2060440	SNRPF	2550	2670	1040	1290	2.06977	0.483146	0.955056
3310010	PPA1	2520	2670	2800	2640	1.01136	0.988764	0.94382
5890204	GPC4	2670	2660	517	672	3.95833	0.252632	1.00376
160167	FAU	2610	2650	2380	2220	1.19369	0.837736	0.984906
240673	MDH2	2330	2650	2190	2090	1.26794	0.788679	0.879245
2570433	STK24	2730	2640	1820	2090	1.26316	0.791667	1.03409
380372	NME4	2540	2640	1220	1230	2.14634	0.465909	0.962121
670468	STRAP	2530	2640	2480	2620	1.00763	0.992424	0.958333
2030463	NDUFS5	2260	2630	1430	1500	1.75333	0.570342	0.859316
870164	ATP5J2	2920	2620	2220	2250	1.16444	0.858779	1.1145
1820424	DNAJC9	2870	2620	1470	1480	1.77027	0.564885	1.09542
6940338	FBLN1	2930	2610	486	503	5.18887	0.19272	1.12261
2370703	CNBP	2690	2610	1410	1410	1.85106	0.54023	1.03065
1500278	EFNB2	2260	2610	1250	1490	1.75168	0.570881	0.8659
4250598	SFRP2	2050	2610	330	332	7.86145	0.127203	0.785441
7000465	TARS	2560	2600	1250	1210	2.14876	0.465385	0.984615
1580484	TUBB	2340	2600	3610	2770	0.938628	1.06538	0.9
4290202	RPS23	2900	2590	4640	4980	0.52008	1.92278	1.11969
460273	UBE2I	2940	2580	1330	1240	2.08065	0.48062	1.13953
3060059	ARCN1	2740	2580	1710	1580	1.63291	0.612403	1.06202
2370497	PSMA5	2600	2580	1380	1510	1.70861	0.585271	1.00775
2630328	ACLY	1980	2570	3210	3020	0.850993	1.1751	0.770428
4290475	SNRPB	2760	2560	539	573	4.46771	0.223828	1.07812
5270379	PSMC5	2470	2560	1740	1880	1.3617	0.734375	0.964844
2120091	UBXD8	2760	2550	1950	2200	1.15909	0.862745	1.08235
6110047	RAI14	2300	2550	486	567	4.49735	0.222353	0.901961
6450360	UQCRFS1	2750	2540	2530	2380	1.06723	0.937008	1.08268
2070255	DRAP1	2600	2540	2400	2480	1.02419	0.976378	1.02362
6560324	PFN1	2160	2540	581	621	4.09018	0.244488	0.850394
6420086	DNAJA1	3060	2530	3120	3000	0.843333	1.18577	1.20949
5490358	CDK6	2380	2530	546	553	4.57505	0.218577	0.940711
4920064	HDDC2	2610	2520	1940	2100	1.2	0.833333	1.03571
2650164	CKAP5	2460	2520	2230	2030	1.24138	0.805556	0.97619
6620546	MSN	2370	2520	1410	1620	1.55556	0.642857	0.940476
1030653	CLIP2	2770	2510	4950	5040	0.498016	2.00797	1.10359
270497	PSMB5	2410	2510	1950	1880	1.33511	0.749004	0.960159
6860309	SSBP1	2310	2510	1230	1300	1.93077	0.517928	0.920319
2810538	SOX11	2420	2500	2450	2520	0.992063	1.008	0.968
770112	C9ORF58	2540	2490	2380	2520	0.988095	1.01205	1.02008
1410707	DNMT1	2440	2490	1660	1830	1.36066	0.73494	0.97992
6960593	ANAPC13	2200	2490	2480	2550	0.976471	1.0241	0.883534
2360520	ACOT7	2680	2480	2540	2090	1.1866	0.842742	1.08065
4260446	ARID3A	2200	2480	201	208	11.9231	0.083871	0.887097
5080114	LHFP	2180	2480	593	683	3.63104	0.275403	0.879032
4490292	MAP2K1	2100	2480	1070	961	2.58065	0.3875	0.846774
7160332	RHEB	2670	2470	2800	2330	1.06009	0.94332	1.08097
4050523	SLC44A2	2510	2470	1440	1570	1.57325	0.635628	1.01619
6980021	NAP1L1	2440	2460	916	866	2.84065	0.352033	0.99187
2100441	QARS	2450	2450	1970	2080	1.17788	0.84898	1
7400181	MRPL3	2390	2450	1750	1850	1.32432	0.755102	0.97551
5390136	HSPE1	2020	2450	1420	1450	1.68966	0.591837	0.82449
5870138	TTYH3	2450	2440	3140	3120	0.782051	1.27869	1.0041
1980491	SCARB2	2390	2440	4530	4970	0.490946	2.03689	0.979508
630673	YWHAB	2350	2440	3370	3430	0.71137	1.40574	0.963115
5270500	CDK4	2650	2430	873	944	2.57415	0.388477	1.09053
940551	PSAT1	2860	2420	874	970	2.49485	0.400826	1.18182
1240138	EIF3M	2510	2420	1250	1230	1.96748	0.508264	1.03719
7200079	C20ORF52	2580	2410	1550	1610	1.49689	0.66805	1.07054
3370487	ARHGAP21	2510	2410	4270	4320	0.55787	1.79253	1.04149
10458	UHRF1	2170	2410	496	601	4.00998	0.249378	0.900415
380504	GHITM	2420	2400	2940	2850	0.842105	1.1875	1.00833
4830563	LSM4	2370	2400	1020	846	2.83688	0.3525	0.9875
6370341	RCAN1	2450	2390	3300	3130	0.763578	1.30962	1.0251
4590441	DPYSL3	2290	2390	14400	13900	0.171942	5.8159	0.958159
2900482	EIF3F	2110	2390	1380	1390	1.71942	0.58159	0.882845
940397	IGF2R	2490	2380	837	847	2.80992	0.355882	1.04622
2370672	FLNC	2230	2380	2940	2950	0.80678	1.2395	0.936975
4540471	ZRANB2	2090	2380	2600	2480	0.959677	1.04202	0.878151
1110082	LOC731049	3160	2370	843	720	3.29167	0.303797	1.33333
1940450	NME1-NME2	2430	2370	1510	1490	1.5906	0.628692	1.02532
3290066	EIF4B	2280	2370	1970	2130	1.11268	0.898734	0.962025
5690431	DNAJC8	2480	2360	2480	2450	0.963265	1.03814	1.05085
1740343	BRD9	2410	2360	2010	1860	1.26882	0.788136	1.02119
2100164	HNRPH1	2230	2350	1690	1480	1.58784	0.629787	0.948936
1050605	TACC1	2090	2350	1770	1610	1.45963	0.685106	0.889362
3800762	FDFT1	1760	2350	1660	1590	1.47799	0.676596	0.748936
2070468	SNRP70	2390	2340	2820	2560	0.914062	1.09402	1.02137
6760341	SEC11A	2250	2340	1470	1410	1.65957	0.602564	0.961538
6550717	GINS2	2360	2330	504	486	4.79424	0.208584	1.01288
4200301	PSMD14	2250	2330	1350	1460	1.59589	0.626609	0.965665
2340674	ZNF14	763	2330	5070	4020	0.579602	1.72532	0.327468
650019	PGD	2050	2320	2320	1980	1.17172	0.853448	0.883621
2570482	NARS	2540	2310	1790	1800	1.28333	0.779221	1.09957
1110575	ABLIM1	2020	2310	1220	1230	1.87805	0.532468	0.874459
6450753	PON2	2020	2310	2930	3350	0.689552	1.45022	0.874459
1780392	DKC1	2260	2300	1420	1310	1.75573	0.569565	0.982609
6220047	HIGD1A	2220	2300	1810	2020	1.13861	0.878261	0.965217
7380239	CMTM3	2120	2300	805	886	2.59594	0.385217	0.921739
6770619	RNPS1	2480	2290	1500	1380	1.65942	0.60262	1.08297
7150719	COL2A1	2180	2290	229	232	9.87069	0.10131	0.951965
6200095	COL5A1	1990	2290	1540	1780	1.28652	0.777293	0.868996
1940528	VGF	3440	2280	4460	5540	0.411552	2.42982	1.50877
3710296	FEZ2	2380	2280	2820	2930	0.778157	1.28509	1.04386
3130674	POU3F2	1830	2280	1060	1030	2.21359	0.451754	0.802632
6650601	PIN1	2530	2270	1890	1970	1.15228	0.867841	1.11454
5090504	SRRM2	2380	2270	2720	2580	0.879845	1.13656	1.04846
2120500	ACTN1	2060	2270	317	371	6.1186	0.163436	0.907489
4480088	COPS3	2350	2260	1500	1420	1.59155	0.628319	1.03982
2710730	MEIS2	2150	2260	325	398	5.67839	0.176106	0.951327
1740722	KIAA0152	2150	2260	1610	1490	1.51678	0.659292	0.951327
7570647	FLJ10081	2030	2260	2480	2740	0.824818	1.21239	0.89823
2970468	EIF3D	2280	2250	1040	896	2.51116	0.398222	1.01333
4280300	BCAT1	2110	2250	610	639	3.52113	0.284	0.937778
1300136	LOC391811	2470	2240	1530	1490	1.50336	0.665179	1.10268
3130750	CORO1C	2200	2240	1780	1660	1.3494	0.741071	0.982143
5340711	PSMA1	2300	2230	1620	1460	1.5274	0.654709	1.03139
5810709	LOC26010	2120	2230	1800	1820	1.22527	0.816143	0.950673
2000682	HSBP1	2060	2230	4540	4130	0.539952	1.85202	0.923767
840189	AHR	1720	2230	3940	3570	0.62465	1.6009	0.7713
2370315	SF3B1	2290	2220	2070	2280	0.973684	1.02703	1.03153
4260035	PRKAR1A	2070	2220	3100	2930	0.757679	1.31982	0.932432
3800450	CSE1L	2060	2220	850	866	2.56351	0.39009	0.927928
4060246	PRDX5	2100	2210	3030	2830	0.780919	1.28054	0.950226
1980706	TGFBI	1960	2210	405	767	2.88136	0.347059	0.886878
6290274	RPS4X	2190	2200	1850	1650	1.33333	0.75	0.995455
6900164	DDX3X	2100	2200	1790	1920	1.14583	0.872727	0.954545
6650097	CRMP1	1990	2200	6650	6090	0.361248	2.76818	0.904545
6660292	PSMC2	2180	2190	1380	1590	1.37736	0.726027	0.995434
6450228	HK1	2030	2190	3740	3830	0.571802	1.74886	0.926941
1820093	BTG1	2820	2180	1490	1720	1.26744	0.788991	1.29358
2100615	PITPNB	2360	2180	2090	2140	1.01869	0.981651	1.08257
6620427	PEA15	2220	2180	3710	3940	0.553299	1.80734	1.01835
6940242	HDAC1	2620	2170	790	767	2.8292	0.353456	1.20737
3420341	RRM1	2270	2170	816	946	2.29387	0.435945	1.04608
3840243	VANGL2	2140	2170	1730	1670	1.2994	0.769585	0.986175
1990327	WDR68	1890	2170	3280	2680	0.809701	1.23502	0.870968
60328	LOC339123	2330	2160	2670	2880	0.75	1.33333	1.0787
3930243	ARPC5	1840	2160	1630	1760	1.22727	0.814815	0.851852
4200577	NCOA4	2160	2150	2950	3050	0.704918	1.4186	1.00465
5290647	GSPT1	2090	2150	1110	1320	1.62879	0.613953	0.972093
6020307	CXADR	2000	2150	4040	3910	0.549872	1.8186	0.930233
6660246	FBLN1	1910	2150	423	502	4.28287	0.233488	0.888372
4050398	SLC25A3	2010	2140	913	875	2.44571	0.408879	0.939252
4540386	PPP1CB	1920	2140	1480	1560	1.37179	0.728972	0.897196
3840204	ZIC2	1790	2140	366	436	4.90826	0.203738	0.836449
5080544	EBNA1BP2	2120	2130	1560	1470	1.44898	0.690141	0.995305
2690626	DHX15	2080	2130	1230	1350	1.57778	0.633803	0.976526
6760768	CSNK2B	2260	2120	1300	1270	1.66929	0.599057	1.06604
5550343	LMNB2	2120	2120	748	807	2.62701	0.38066	1
5720475	FLOT2	2020	2120	1680	1690	1.25444	0.79717	0.95283
2710446	PTRF	1930	2120	897	1030	2.05825	0.485849	0.910377
5690370	IGFBP2	1870	2120	1440	1870	1.13369	0.882075	0.882075
270521	LOC728564	2120	2110	488	438	4.81735	0.207583	1.00474
4220195	UBB	2040	2110	1900	1850	1.14054	0.876777	0.966825
2900626	HN1	2010	2110	4170	3670	0.574932	1.73934	0.952607
4280139	LSM2	1940	2110	1090	1110	1.9009	0.526066	0.919431
20136	MRPL15	1880	2110	1230	1270	1.66142	0.601896	0.890995
4210040	ARF4	2580	2100	1510	1440	1.45833	0.685714	1.22857
2690609	CUTA	2170	2100	1540	1580	1.32911	0.752381	1.03333
3180070	AOF2	2130	2100	1470	1520	1.38158	0.72381	1.01429
650102	PRICKLE4	2070	2100	1210	1390	1.51079	0.661905	0.985714
7000180	SLC16A9	1780	2100	780	843	2.4911	0.401429	0.847619
2140598	TUBB2C	1690	2100	2690	2410	0.871369	1.14762	0.804762
5050487	CCDC23	2240	2090	2610	2750	0.76	1.31579	1.07177
2490468	UXT	2220	2090	1410	1560	1.33974	0.746411	1.0622
4200551	MDH1	1970	2090	2500	2370	0.881857	1.13397	0.942584
6040521	TIMP2	1940	2090	4770	5100	0.409804	2.44019	0.92823
630324	POLR2F	1780	2090	1660	1570	1.33121	0.751196	0.851675
4050347	ADRM1	2300	2080	1340	1390	1.4964	0.668269	1.10577
3120687	HCFC1	2280	2080	1710	1710	1.21637	0.822115	1.09615
4040278	PPP6C	2080	2080	1250	1350	1.54074	0.649038	1
3710392	COMMD6	1930	2080	2330	2600	0.8	1.25	0.927885
4780564	DPYSL4	2290	2070	1720	1660	1.24699	0.801932	1.10628
460220	ATP6V1G1	2110	2070	2090	2150	0.962791	1.03865	1.01932
2490279	C19ORF2	2070	2070	1560	1640	1.2622	0.792271	1
3450228	SUMO3	1720	2070	2880	2540	0.814961	1.22705	0.830918
6770095	MTHFD2	2490	2060	387	336	6.13095	0.163107	1.20874
4230537	PPP2CB	2150	2060	3130	3040	0.677632	1.47573	1.04369
6330162	TMEM14C	1970	2060	1110	1240	1.66129	0.601942	0.956311
150129	DYNC1LI2	1930	2060	3210	3220	0.639752	1.56311	0.936893
5820431	TXLNA	2270	2050	1270	1310	1.56489	0.639024	1.10732
150021	GNL2	2230	2050	986	1010	2.0297	0.492683	1.0878
1240161	RNF7	1970	2050	1630	1610	1.27329	0.785366	0.960976
610603	PIGY	1840	2050	2350	2330	0.879828	1.13659	0.897561
6650020	ADM	2860	2040	104	163	12.5153	0.079902	1.40196
510450	RCC2	1950	2040	532	604	3.37748	0.296078	0.955882
5050678	XPNPEP1	1890	2040	1900	2040	1	1	0.926471
1690189	HSPA8	2370	2030	2640	2260	0.89823	1.1133	1.16749
6940068	BOLA2	1940	2030	1140	1050	1.93333	0.517241	0.955665
630368	EPN1	2210	2020	2540	2610	0.773946	1.29208	1.09406
2760470	SNRPB2	2010	2020	1290	1340	1.50746	0.663366	0.99505
5050328	LPHN2	1830	2020	838	961	2.10198	0.475743	0.905941
830070	PAM	1540	2020	2520	2490	0.811245	1.23267	0.762376
1230615	SERPINH1	2060	2010	293	341	5.89443	0.169652	1.02488
2940403	REXO2	1900	2010	973	1080	1.86111	0.537313	0.945274
1110215	FAM62A	1840	2010	902	1000	2.01	0.497512	0.915423
1820044	RPS27A	1740	2010	1390	1490	1.34899	0.741294	0.865672
610563	HMGB2	2170	2000	163	163	12.2699	0.0815	1.085
2640114	IARS	2010	2000	1050	996	2.00803	0.498	1.005
7150739	RARS	2000	2000	1300	1360	1.47059	0.68	1
1430064	C20ORF24	1990	2000	2020	2030	0.985222	1.015	0.995
1820767	RERE	1930	2000	1870	1750	1.14286	0.875	0.965
2140022	RPN1	2240	1990	2230	2270	0.876652	1.1407	1.12563
6770259	YTHDC1	2110	1990	2350	2480	0.802419	1.24623	1.0603
7320484	SPTAN1	2100	1990	4480	4530	0.439294	2.27638	1.05528
3840364	GLO1	2050	1990	1020	1020	1.95098	0.512563	1.03015
70669	SC4MOL	1150	1990	3400	2880	0.690972	1.44724	0.577889
5810113	PSMC3	2190	1980	1110	985	2.01015	0.497475	1.10606
4560082	C16ORF61	2090	1980	1740	1800	1.1	0.909091	1.05556
6370110	MYO10	1900	1980	946	1190	1.66387	0.60101	0.959596
1990538	SSB	2040	1970	1720	1490	1.32215	0.756345	1.03553
1740735	DAZAP2	2000	1970	2140	2170	0.907834	1.10152	1.01523
6200376	IFITM2	1980	1970	1570	1930	1.02073	0.979695	1.00508
6380601	NAT5	1970	1970	1890	1840	1.07065	0.93401	1
3440156	ARPC1A	1960	1970	1330	1250	1.576	0.634518	0.994924
4730040	TMEM2	1650	1970	193	151	13.0464	0.0766497	0.837563
6250035	C7ORF38	845	1970	3990	3120	0.63141	1.58376	0.428934
2360022	NGFRAP1	1920	1960	2550	2300	0.852174	1.17347	0.979592
380215	NOL7	1900	1960	1030	1320	1.48485	0.673469	0.969388
5910088	EIF4H	1790	1960	1360	1140	1.7193	0.581633	0.913265
7210458	TAGLN3	2170	1950	3540	3170	0.615142	1.62564	1.11282
70370	TMEM98	2130	1950	1150	1170	1.66667	0.6	1.09231
7210630	ATP5L	2090	1950	1450	1450	1.34483	0.74359	1.07179
7380112	TPI1	1940	1950	1710	1740	1.12069	0.892308	0.994872
430626	TEAD2	1830	1950	611	832	2.34375	0.426667	0.938462
150192	DDX47	1830	1950	1490	1540	1.26623	0.789744	0.938462
6520048	ITM2C	1780	1950	1850	2050	0.95122	1.05128	0.912821
2120446	RANBP1	1700	1950	707	704	2.76989	0.361026	0.871795
3420040	SNRPB	2140	1940	831	740	2.62162	0.381443	1.10309
270196	THOC7	1970	1940	1430	1430	1.35664	0.737113	1.01546
620750	GTF2A2	1950	1940	1540	1440	1.34722	0.742268	1.00515
5290494	CNDP2	1820	1940	2000	2120	0.915094	1.09278	0.938144
2370370	BSCL2	2080	1930	5850	5690	0.339192	2.94819	1.07772
110619	PSMB7	1950	1930	1450	1300	1.48462	0.673575	1.01036
1780403	SEC61G	1930	1930	1370	1430	1.34965	0.740933	1
6770671	CCNA2	1890	1930	200	236	8.17797	0.12228	0.979275
5090204	C2ORF25	1800	1930	1060	993	1.94361	0.514508	0.932642
5870328	GNAI2	1690	1930	1970	1960	0.984694	1.01554	0.875648
6520671	SFRS5	1930	1920	2620	2440	0.786885	1.27083	1.00521
4230164	RBPMS2	1830	1920	230	218	8.80734	0.113542	0.953125
6580546	ATP5J	1780	1920	1530	1660	1.15663	0.864583	0.927083
6270082	MCM8	1410	1920	3070	2760	0.695652	1.4375	0.734375
2630333	PSMB3	2070	1910	1310	1200	1.59167	0.628272	1.08377
2450608	COL3A1	1250	1910	1680	1890	1.01058	0.989529	0.65445
5720647	ADAM19	1220	1910	628	733	2.60573	0.38377	0.638743
2710278	SHMT2	2440	1900	569	512	3.71094	0.269474	1.28421
4560445	TCEB2	2210	1900	2490	2330	0.815451	1.22632	1.16316
1500053	SPECC1L	2140	1900	1600	1660	1.14458	0.873684	1.12632
7200593	IGF2BP2	1900	1900	821	811	2.34279	0.426842	1
2970044	MRPS21	1710	1900	1420	1470	1.29252	0.773684	0.9
2490747	AARS	2150	1890	2390	2210	0.855204	1.16931	1.13757
3520739	CPSF4	1990	1890	1470	1390	1.35971	0.73545	1.05291
3310022	MAD2L2	1950	1890	848	774	2.44186	0.409524	1.03175
6550438	SPCS1	1860	1890	2100	2230	0.847534	1.17989	0.984127
2070112	DDA1	1810	1890	1130	1130	1.67257	0.597884	0.957672
610372	PRDX3	1790	1890	1340	1530	1.23529	0.809524	0.94709
6060347	PPIB	2050	1880	1410	1390	1.35252	0.739362	1.09043
4120707	RPL23	1920	1880	1260	1170	1.60684	0.62234	1.02128
3310102	GNS	1810	1880	2050	2310	0.813853	1.22872	0.962766
6590025	GTF3A	1710	1880	1880	2170	0.866359	1.15426	0.909574
50164	NUP93	1660	1880	1480	1310	1.43511	0.696809	0.882979
50500	COPB1	2110	1870	1240	1180	1.58475	0.631016	1.12834
5490521	TYMS	1840	1870	393	396	4.72222	0.211765	0.983957
1260100	MFGE8	1780	1870	1350	1360	1.375	0.727273	0.951872
5290408	DYNC1I2	1700	1870	1790	1900	0.984211	1.01604	0.909091
240341	BGN	1380	1870	104	168	11.131	0.0898396	0.737968
290347	GTPBP4	1980	1860	1360	1220	1.52459	0.655914	1.06452
1110288	MAPK6	1960	1860	1950	1940	0.958763	1.04301	1.05376
1710403	PSMB4	1900	1860	1560	1520	1.22368	0.817204	1.02151
2260193	SF3A3	1870	1860	868	805	2.31056	0.432796	1.00538
150132	NDUFA1	1740	1860	1900	1940	0.958763	1.04301	0.935484
3840377	YY1	1690	1860	1290	1450	1.28276	0.77957	0.908602
3390541	ATP6AP1	1890	1850	3350	3100	0.596774	1.67568	1.02162
3850370	PNMA2	1860	1850	2490	2510	0.737052	1.35676	1.00541
2360386	ALDH7A1	1670	1850	847	864	2.1412	0.467027	0.902703
5090600	POLR2B	1660	1850	1640	1420	1.30282	0.767568	0.897297
2970634	MACF1	1660	1850	1950	1950	0.948718	1.05405	0.897297
1010068	PHLDA1	3070	1840	731	719	2.55911	0.390761	1.66848
2970739	SLC7A1	2400	1840	1110	1110	1.65766	0.603261	1.30435
5310017	API5	1870	1840	1210	1120	1.64286	0.608696	1.0163
6020523	KLHDC3	1810	1840	1830	1770	1.03955	0.961957	0.983696
1450463	C14ORF166	1720	1840	881	859	2.14203	0.466848	0.934783
7380670	39702	1620	1840	766	938	1.96162	0.509783	0.880435
4280725	HES4	2750	1830	3510	3380	0.54142	1.84699	1.50273
5860189	CNIH4	2000	1830	755	772	2.37047	0.421858	1.0929
1300441	MSH6	1970	1830	883	998	1.83367	0.545355	1.0765
830132	GMFB	1770	1830	1910	1910	0.958115	1.04372	0.967213
3990482	URM1	1750	1830	972	950	1.92632	0.519126	0.956284
5690673	RBMX	1640	1830	641	717	2.5523	0.391803	0.896175
20634	SNRPA1	1850	1820	1430	1330	1.36842	0.730769	1.01648
4290195	TIMP1	1780	1820	1180	1240	1.46774	0.681319	0.978022
4220181	NDUFS8	1950	1810	1660	1780	1.01685	0.983425	1.07735
1410358	ADAR	1860	1810	2210	2000	0.905	1.10497	1.02762
4250017	MSRB2	1630	1810	1540	1530	1.18301	0.845304	0.900552
7050450	SLC25A6	1600	1810	1020	1050	1.72381	0.58011	0.883978
4210195	ZNF207	1950	1800	860	914	1.96937	0.507778	1.08333
7510608	DDR1	1890	1800	3440	3460	0.520231	1.92222	1.05
270292	CCNK	1860	1800	1130	1130	1.59292	0.627778	1.03333
2060687	NDUFV2	1850	1800	1320	1150	1.56522	0.638889	1.02778
4290356	PUM1	1590	1800	2070	1950	0.923077	1.08333	0.883333
2750431	PRR6	1970	1790	1280	1120	1.59821	0.625698	1.10056
2370338	ALDH9A1	1860	1790	1880	1840	0.972826	1.02793	1.03911
1980458	RND3	1800	1790	1800	2290	0.781659	1.27933	1.00559
7320593	AHCY	1690	1790	755	798	2.24311	0.44581	0.944134
6250280	CBFB	1600	1790	950	901	1.98668	0.503352	0.893855
7160458	FBXL10	1560	1790	1990	2050	0.873171	1.14525	0.871508
2340408	TDG	1840	1780	1260	1140	1.5614	0.640449	1.03371
4480594	SLC20A1	1740	1780	1510	1290	1.37984	0.724719	0.977528
20750	UBXD2	1720	1780	1650	1800	0.988889	1.01124	0.966292
2510110	BZW2	1710	1780	1020	942	1.8896	0.529213	0.960674
150296	RBX1	1640	1780	1410	1250	1.424	0.702247	0.921348
160377	LGALS1	1500	1780	413	619	2.87561	0.347753	0.842697
6450678	NUDT21	1450	1780	1460	1500	1.18667	0.842697	0.814607
1780215	LUM	1250	1780	1380	1740	1.02299	0.977528	0.702247
4610075	TFRC	1820	1770	1200	1090	1.62385	0.615819	1.02825
7050739	JTV1	1670	1770	771	853	2.07503	0.481921	0.943503
3610196	PALLD	1660	1770	819	970	1.82474	0.548023	0.937853
3360433	IGF2BP3	1640	1770	389	472	3.75	0.266667	0.926554
450091	TMEM123	1580	1770	570	660	2.68182	0.372881	0.892655
6100441	ACTR2	1570	1770	1480	1550	1.14194	0.875706	0.887006
3190202	TERF2IP	1990	1760	5260	4640	0.37931	2.63636	1.13068
5670521	EIF2S3	1780	1760	1160	1130	1.55752	0.642045	1.01136
3870543	RFWD2	1780	1760	1500	1620	1.08642	0.920455	1.01136
5220687	LSM14A	1740	1760	1030	1070	1.64486	0.607955	0.988636
2340437	SMC3	1880	1750	1160	1220	1.43443	0.697143	1.07429
1030017	LSMD1	1740	1750	1450	1330	1.31579	0.76	0.994286
1980521	MCART1	978	1750	3880	3470	0.504323	1.98286	0.558857
2000753	EDF1	1880	1740	1700	1670	1.04192	0.95977	1.08046
7320576	EIF3I	1710	1740	1430	1230	1.41463	0.706897	0.982759
3370605	SIPA1L2	1710	1740	1850	1980	0.878788	1.13793	0.982759
4050243	CLNS1A	1680	1740	1470	1590	1.09434	0.913793	0.965517
520008	AP1S2	1680	1740	2260	2290	0.759825	1.31609	0.965517
2140356	RPN2	1670	1740	1110	995	1.74874	0.571839	0.95977
1190735	PRSS23	1520	1740	369	563	3.09059	0.323563	0.873563
460093	UBE2E1	1920	1730	1550	1850	0.935135	1.06936	1.10983
610465	KIF1B	1770	1730	5090	5130	0.337232	2.96532	1.02312
5960402	PCM1	1710	1730	1200	1150	1.50435	0.66474	0.988439
1110554	TM9SF4	1670	1730	2240	2000	0.865	1.15607	0.965318
130092	PGAM4	1520	1730	1090	1250	1.384	0.722543	0.878613
6400674	DGUOK	2000	1720	1500	1400	1.22857	0.813953	1.16279
6520743	VKORC1	1860	1720	1830	1860	0.924731	1.0814	1.0814
3170291	ADSL	1770	1720	786	749	2.2964	0.435465	1.02907
2710452	DERA	1730	1720	488	545	3.15596	0.31686	1.00581
6100064	HNRPDL	1660	1720	1990	1930	0.891192	1.12209	0.965116
2510731	NETO2	1570	1720	2560	2790	0.616487	1.62209	0.912791
5270131	C19ORF48	2320	1710	386	387	4.4186	0.226316	1.35673
2940494	CETN2	1800	1710	3980	4240	0.403302	2.47953	1.05263
2940035	GPX1	1760	1710	831	766	2.23238	0.447953	1.02924
1430333	SUZ12	1650	1710	1440	1550	1.10323	0.906433	0.964912
3370327	DENR	1650	1710	1830	1830	0.934426	1.07018	0.964912
3390685	MKRN1	1650	1710	1930	2110	0.810427	1.23392	0.964912
3370736	PSMG2	1620	1710	1150	1210	1.41322	0.707602	0.947368
3460681	39694	1580	1710	10200	10500	0.162857	6.14035	0.923977
2480255	FNBP1L	1400	1710	3170	3440	0.497093	2.0117	0.818713
5390725	SELS	2410	1700	1700	1720	0.988372	1.01176	1.41765
6510309	RPL13A	1850	1700	1300	1230	1.38211	0.723529	1.08824
5290180	RING1	1790	1700	2290	2390	0.711297	1.40588	1.05294
4560025	TPD52L2	1770	1700	1480	1520	1.11842	0.894118	1.04118
4290711	RPA3	1630	1700	506	579	2.9361	0.340588	0.958824
3310364	TUSC3	1520	1700	2690	3090	0.550162	1.81765	0.894118
6130746	ARF1	1830	1690	1470	1430	1.18182	0.846154	1.08284
1340441	DEK	1730	1690	682	686	2.46356	0.405917	1.02367
3140152	RBM22	1700	1690	1730	1780	0.949438	1.05325	1.00592
5340475	NAE1	1690	1690	1060	1050	1.60952	0.621302	1
5900541	COX6A1	1690	1690	1650	1720	0.982558	1.01775	1
6110768	ATIC	1640	1690	898	956	1.76778	0.56568	0.970414
4760543	NUP62	1610	1690	1150	1150	1.46957	0.680473	0.952663
6100605	TMEM47	1610	1690	1480	1630	1.03681	0.964497	0.952663
1240326	LIMCH1	1280	1690	935	1010	1.67327	0.597633	0.757396
6520438	ARL5A	1890	1680	1530	1730	0.971098	1.02976	1.125
6220209	NDUFS4	1700	1680	1570	1630	1.03067	0.970238	1.0119
4860195	G6PC3	1670	1680	1360	1430	1.17483	0.85119	0.994048
6400021	HSPB1	1620	1680	1040	1190	1.41176	0.708333	0.964286
5390594	NCAPG	1550	1680	96.9	105	16	0.0625	0.922619
2850471	TMEM59	1510	1680	2610	2550	0.658824	1.51786	0.89881
6220377	SFRS10	1880	1670	1120	1180	1.41525	0.706587	1.12575
1430243	CALU	1650	1670	807	821	2.0341	0.491617	0.988024
3130241	RAB11A	1630	1670	1780	1760	0.948864	1.05389	0.976048
1090747	ME2	1590	1670	1030	998	1.67335	0.597605	0.952096
4210291	IFITM3	1590	1670	1500	1590	1.05031	0.952096	0.952096
1690543	C14ORF130	1570	1670	1310	1380	1.21014	0.826347	0.94012
1070181	SUMO2	1400	1670	1240	1390	1.20144	0.832335	0.838323
290369	SF3B4	1810	1660	1170	1110	1.4955	0.668675	1.09036
1710332	TCP1	1720	1660	1280	1200	1.38333	0.722892	1.03614
4890711	EMD	1720	1660	1510	1410	1.1773	0.849398	1.03614
1190161	PSMB2	1700	1660	891	960	1.72917	0.578313	1.0241
5270672	GPX4	1650	1660	1340	1130	1.46903	0.680723	0.993976
5340754	ANTXR1	1640	1660	1670	1770	0.937853	1.06627	0.987952
1410215	ARL2BP	1620	1660	1770	1510	1.09934	0.909639	0.975904
870148	FNDC3B	1490	1660	1040	1190	1.39496	0.716867	0.89759
1780348	IMP3	1380	1660	1690	1540	1.07792	0.927711	0.831325
2600286	NAP1L4	1230	1660	1240	1090	1.52294	0.656627	0.740964
6840551	KRTCAP2	2040	1650	1520	1370	1.20438	0.830303	1.23636
460072	CDCA5	1950	1650	230	261	6.32184	0.158182	1.18182
3170576	BUD31	1800	1650	966	933	1.76849	0.565455	1.09091
3450221	C10ORF38	1620	1650	1810	1790	0.921788	1.08485	0.981818
360056	NRD1	1610	1650	1720	1720	0.959302	1.04242	0.975758
770647	TINP1	1600	1650	1060	1020	1.61765	0.618182	0.969697
5700296	TSPAN3	1570	1650	2950	2640	0.625	1.6	0.951515
2680243	DLX1	1550	1650	1	1	1650	0.000606061	0.939394
3610192	MRPL22	1870	1640	968	1060	1.54717	0.646341	1.14024
2470093	EIF1B	1750	1640	1440	1540	1.06494	0.939024	1.06707
2450603	UBE2C	1710	1640	185	202	8.11881	0.123171	1.04268
840075	RBM25	1560	1640	1840	1730	0.947977	1.05488	0.95122
3460152	DDOST	1550	1640	1090	1070	1.53271	0.652439	0.945122
2260102	NDN	1510	1640	2890	2980	0.550336	1.81707	0.920732
990669	PCMT1	1510	1640	3660	4190	0.391408	2.55488	0.920732
3460201	DAP	1770	1630	706	742	2.19677	0.455215	1.08589
5890274	PTTG1IP	1650	1630	1420	1520	1.07237	0.932515	1.01227
1030201	NDUFB11	1640	1630	1460	1340	1.21642	0.822086	1.00613
7560445	TMED2	1620	1630	1160	1210	1.34711	0.742331	0.993865
580048	MAT2B	1590	1630	655	826	1.97337	0.506748	0.97546
20220	DKK3	1570	1630	6410	6350	0.256693	3.89571	0.96319
2600184	GJA1	1500	1630	488	648	2.51543	0.397546	0.920245
7150360	ARHGEF2	1800	1620	626	629	2.57552	0.388272	1.11111
2060441	GLG1	1740	1620	2220	1990	0.81407	1.2284	1.07407
10224	FAM152A	1700	1620	1070	992	1.63306	0.612346	1.04938
6480722	ATP6V1D	1640	1620	1840	1870	0.86631	1.15432	1.01235
4220669	PRCP	1610	1620	1550	1690	0.95858	1.04321	0.993827
7560202	C1QBP	1560	1620	1090	1080	1.5	0.666667	0.962963
990392	YTHDF2	1490	1620	1160	1310	1.23664	0.808642	0.919753
6060358	TCTEX1D2	1410	1620	2760	2830	0.572438	1.74691	0.87037
4060220	ITGAV	1400	1620	783	813	1.99262	0.501852	0.864198
2710301	SLC38A1	1880	1610	1450	1290	1.24806	0.801242	1.1677
3520072	P4HB	1790	1610	848	798	2.01754	0.495652	1.1118
450754	ALDOA	1660	1610	1330	1200	1.34167	0.745342	1.03106
5290711	TRIM24	1610	1610	1630	1470	1.09524	0.913043	1
3450719	POLR2G	1470	1610	1260	1170	1.37607	0.726708	0.913043
4230373	ZNF207	1910	1600	912	1090	1.46789	0.68125	1.19375
3840333	UBE2M	1790	1600	1250	1220	1.31148	0.7625	1.11875
630273	UBL5	1760	1600	1220	1300	1.23077	0.8125	1.1
4880195	NSUN2	1730	1600	1090	1080	1.48148	0.675	1.08125
5490408	ZMPSTE24	1660	1600	1310	1400	1.14286	0.875	1.0375
50176	DNAJA2	1600	1600	1950	2060	0.776699	1.2875	1
1430239	BAALC	1430	1600	1300	1300	1.23077	0.8125	0.89375
7200673	PSME4	1630	1590	624	707	2.24894	0.444654	1.02516
4900053	PUF60	1620	1590	1670	1580	1.00633	0.993711	1.01887
6270491	BOLA3	1580	1590	1050	1110	1.43243	0.698113	0.993711
1690544	ZYX	1570	1590	1040	965	1.64767	0.606918	0.987421
3190431	NUP107	1520	1590	431	453	3.50993	0.284906	0.955975
540072	UCHL1	1520	1590	5660	5240	0.303435	3.2956	0.955975
6590446	CADM1	1450	1590	2240	2300	0.691304	1.44654	0.91195
2100221	ALKBH5	1840	1580	2100	1950	0.810256	1.23418	1.16456
3460184	LOC730316	1690	1580	2040	1800	0.877778	1.13924	1.06962
6560274	VIL2	1660	1580	1360	1400	1.12857	0.886076	1.05063
6480114	LOC731314	1380	1580	497	545	2.89908	0.344937	0.873418
650040	PTPRZ1	1290	1580	3360	3280	0.481707	2.07595	0.816456
6220367	EPRS	1740	1570	1230	1240	1.26613	0.789809	1.10828
4880086	ETV5	1670	1570	364	339	4.63127	0.215924	1.06369
6280474	DDX21	1560	1570	949	760	2.06579	0.484076	0.993631
2450239	CDC37	1540	1570	1330	1360	1.15441	0.866242	0.980892
2320594	FRMD4A	1530	1570	984	989	1.58746	0.629936	0.974522
2480128	SS18L2	1500	1570	1760	1730	0.907514	1.10191	0.955414
4810528	ARMCX2	1260	1570	1630	1740	0.902299	1.10828	0.802548
6110132	RPP21	1680	1560	1700	1690	0.923077	1.08333	1.07692
1510685	PSMD4	1590	1560	1020	916	1.70306	0.587179	1.01923
5810402	CRKL	1580	1560	1860	1910	0.816754	1.22436	1.01282
5090133	C3ORF1	1510	1560	1240	1430	1.09091	0.916667	0.967949
610392	CCT6A	1490	1560	1970	1830	0.852459	1.17308	0.955128
4260142	PEBP1	1390	1560	2170	1980	0.787879	1.26923	0.891026
5890327	AKR1B1	1360	1560	1110	1030	1.51456	0.660256	0.871795
2750450	TCEAL4	1710	1550	2880	3260	0.47546	2.10323	1.10323
1500670	COX5B	1670	1550	1520	1570	0.987261	1.0129	1.07742
5960242	CENPF	1470	1550	288	312	4.96795	0.20129	0.948387
2190193	MED6	1450	1550	809	764	2.0288	0.492903	0.935484
2690333	ELOVL5	1440	1550	2050	2010	0.771144	1.29677	0.929032
5390072	CDH6	1290	1550	119	158	9.81013	0.101935	0.832258
1940170	BRD2	1870	1540	1420	1280	1.20312	0.831169	1.21429
4640064	CNOT1	1630	1540	908	919	1.67573	0.596753	1.05844
3400747	TOMM40	1520	1540	652	609	2.52874	0.395455	0.987013
1440465	CCDC14	1510	1540	1300	1320	1.16667	0.857143	0.980519
4490161	HEXB	1480	1540	1030	1080	1.42593	0.701299	0.961039
6100195	TMEM183A	1420	1540	1560	1660	0.927711	1.07792	0.922078
5870484	PAFAH1B1	1400	1540	3160	2880	0.534722	1.87013	0.909091
3290326	SCRN1	1390	1540	1440	1440	1.06944	0.935065	0.902597
990095	SLC2A1	1120	1540	76.3	89.9	17.1301	0.0583766	0.727273
2120056	ZNHIT3	1580	1530	1590	1500	1.02	0.980392	1.03268
360463	NDUFA12	1530	1530	1190	1320	1.15909	0.862745	1
4010050	GABARAPL2	1500	1530	2770	2840	0.538732	1.85621	0.980392
450762	RALA	1440	1530	1860	1880	0.81383	1.22876	0.941176
6960661	MRPL33	1420	1530	823	832	1.83894	0.543791	0.928105
3520768	ATP6AP2	1250	1530	2260	2460	0.621951	1.60784	0.816993
520309	MFSD10	1690	1520	2860	2690	0.565056	1.76974	1.11184
270446	SFRS3	1630	1520	869	865	1.75723	0.569079	1.07237
3190411	PDHB	1600	1520	1620	1640	0.926829	1.07895	1.05263
7040332	LIN28B	1440	1520	86.5	84.4	18.0095	0.0555263	0.947368
3420746	SH3BGRL	1350	1520	1390	1380	1.10145	0.907895	0.888158
6520292	UBE1	1340	1520	2080	1670	0.91018	1.09868	0.881579
5090367	UNG	1330	1520	777	845	1.79882	0.555921	0.875
2750162	MAPK1IP1L	1320	1520	1040	1090	1.3945	0.717105	0.868421
3800026	DCP2	1300	1520	606	600	2.53333	0.394737	0.855263
1660347	SKP2	1280	1520	495	506	3.00395	0.332895	0.842105
2570259	GPM6B	1600	1510	4580	4170	0.36211	2.76159	1.0596
1410452	THYN1	1550	1510	1160	1100	1.37273	0.728477	1.02649
5340341	ACP1	1530	1510	830	834	1.81055	0.552318	1.01325
4610097	SDAD1	1500	1510	1250	1190	1.26891	0.788079	0.993377
7160528	LOC730744	1500	1510	1360	1320	1.14394	0.874172	0.993377
150154	H2AFY	1470	1510	980	883	1.71008	0.584768	0.97351
2030397	NSF	1470	1510	2640	2370	0.637131	1.56954	0.97351
5900612	COLEC12	1130	1510	420	578	2.61246	0.382781	0.748344
380487	FAM150B	1630	1500	174	188	7.97872	0.125333	1.08667
840184	SFRS14	1590	1500	3050	2750	0.545455	1.83333	1.06
4850142	TSG101	1560	1500	1470	1400	1.07143	0.933333	1.04
10524	PRC1	1540	1500	448	412	3.64078	0.274667	1.02667
2350612	SIVA1	1460	1500	478	414	3.62319	0.276	0.973333
830326	FAM96A	1460	1500	766	879	1.70648	0.586	0.973333
380100	ARL6IP5	1370	1500	2680	2740	0.547445	1.82667	0.913333
2760358	ITM2B	1350	1500	2080	2360	0.635593	1.57333	0.9
4920692	BICD2	1310	1500	1850	1700	0.882353	1.13333	0.873333
3990025	PLS3	1300	1500	117	221	6.78733	0.147333	0.866667
5890139	PRNP	1680	1490	3150	3540	0.420904	2.37584	1.12752
650338	TMCO1	1600	1490	1250	1410	1.05674	0.946309	1.07383
630451	PREI3	1540	1490	1930	1710	0.871345	1.14765	1.03356
3130154	PLTP	1510	1490	2450	2470	0.603239	1.65772	1.01342
940128	PSMA3	1450	1490	611	711	2.09564	0.477181	0.973154
130048	FAM127A	1400	1490	2000	2170	0.686636	1.45638	0.939597
1850408	NMU	1380	1490	30.2	30.6	48.6928	0.0205369	0.926174
1230053	NQO1	1300	1490	292	324	4.59877	0.21745	0.872483
2000671	DDAH1	1290	1490	2430	2770	0.537906	1.85906	0.865772
3190445	CARHSP1	1170	1490	643	608	2.45066	0.408054	0.785235
5340164	EXOSC8	1540	1480	558	546	2.71062	0.368919	1.04054
2630270	SND1	1480	1480	812	822	1.80049	0.555405	1
6520767	TOP2A	1440	1480	231	215	6.88372	0.14527	0.972973
1820056	COX6C	1440	1480	1670	1700	0.870588	1.14865	0.972973
7050221	CSTF3	1430	1480	1170	1260	1.1746	0.851351	0.966216
1340170	RFTN1	1430	1480	1190	1450	1.02069	0.97973	0.966216
4280253	C9ORF19	1420	1480	877	975	1.51795	0.658784	0.959459
4780356	PDCD6	1410	1480	1670	1710	0.865497	1.15541	0.952703
5290739	FZD10	1020	1480	677	761	1.94481	0.514189	0.689189
3520008	SLC3A2	3580	1470	731	585	2.51282	0.397959	2.43537
2230731	BCOR	1620	1470	1200	1080	1.36111	0.734694	1.10204
5910273	TCF25	1620	1470	2050	1920	0.765625	1.30612	1.10204
7320364	GPS1	1540	1470	1510	1510	0.97351	1.02721	1.04762
1240139	ACACA	1530	1470	1360	1330	1.10526	0.904762	1.04082
4590242	TALDO1	1490	1470	1370	1350	1.08889	0.918367	1.01361
3140670	SMARCA4	1480	1470	1620	1560	0.942308	1.06122	1.0068
1170296	RFC4	1420	1470	518	540	2.72222	0.367347	0.965986
3400170	VPS29	1410	1470	1170	1340	1.09701	0.911565	0.959184
3850537	RDX	1320	1470	1260	1270	1.15748	0.863946	0.897959
870066	TGIF1	2350	1460	351	496	2.94355	0.339726	1.60959
2230132	VPS37C	1460	1460	965	927	1.57497	0.634932	1
5340767	VDAC1	1380	1460	1020	1150	1.26957	0.787671	0.945205
6130338	SLC30A9	1330	1460	1670	1710	0.853801	1.17123	0.910959
4150750	DCBLD2	1220	1460	595	636	2.2956	0.435616	0.835616
3130091	TMCO3	1150	1460	1350	1410	1.03546	0.965753	0.787671
290196	NEFM	1080	1460	224	257	5.68093	0.176027	0.739726
6980079	POLE	1770	1450	792	778	1.86375	0.536552	1.22069
1980470	SRP54	1590	1450	1490	1340	1.08209	0.924138	1.09655
520647	NT5C2	1560	1450	1520	1370	1.05839	0.944828	1.07586
1470762	LARS	1550	1450	1320	1160	1.25	0.8	1.06897
3400504	IMPDH2	1470	1450	906	1080	1.34259	0.744828	1.01379
3120717	PABPN1	1430	1450	1580	1380	1.05072	0.951724	0.986207
1940446	CAB39	1380	1450	2170	2010	0.721393	1.38621	0.951724
2060008	DEGS1	1340	1450	2190	2370	0.611814	1.63448	0.924138
7650156	EMP1	1330	1450	618	744	1.94892	0.513103	0.917241
7000682	RPL36AL	1280	1450	682	755	1.92053	0.52069	0.882759
2630112	PRDM4	1750	1440	1080	968	1.4876	0.672222	1.21528
3060523	SMAD4	1520	1440	800	953	1.51102	0.661806	1.05556
6110291	ZSCAN18	1480	1440	2580	2630	0.547529	1.82639	1.02778
3180224	HADH	1450	1440	733	868	1.65899	0.602778	1.00694
6060593	PAPSS1	1370	1440	1750	1740	0.827586	1.20833	0.951389
380349	SERPINE2	1360	1440	3030	3480	0.413793	2.41667	0.944444
2750521	NUP205	1350	1440	605	583	2.46998	0.404861	0.9375
2030520	SMG7	1320	1440	1920	1650	0.872727	1.14583	0.916667
4220095	KIF11	1280	1440	205	212	6.79245	0.147222	0.888889
110131	LOC650215	1510	1430	613	680	2.10294	0.475524	1.05594
5890593	MTHFD1L	1490	1430	498	600	2.38333	0.41958	1.04196
4060121	UROD	1470	1430	1690	1450	0.986207	1.01399	1.02797
5690632	LIMK1	1450	1430	1420	1360	1.05147	0.951049	1.01399
160523	LSM5	1390	1430	686	711	2.01125	0.497203	0.972028
4060014	PAPOLA	1360	1430	941	1090	1.31193	0.762238	0.951049
6060201	NUAK1	1300	1430	515	501	2.85429	0.35035	0.909091
5130438	CPNE3	1300	1430	1260	1310	1.0916	0.916084	0.909091
5900241	SF3A2	1290	1430	1020	1030	1.38835	0.72028	0.902098
6650328	E2F3	1270	1430	676	659	2.16995	0.460839	0.888112
3940563	SOX21	1950	1420	1310	1600	0.8875	1.12676	1.37324
4570435	ERH	1730	1420	924	971	1.46241	0.683803	1.21831
1940274	ISG20L1	1530	1420	453	515	2.75728	0.362676	1.07746
4260154	POLE3	1500	1420	670	643	2.2084	0.452817	1.05634
2450064	ZFP91	1480	1420	1320	1440	0.986111	1.01408	1.04225
1070114	POLE4	1450	1420	1380	1340	1.0597	0.943662	1.02113
2900156	TXNDC5	1350	1420	441	438	3.24201	0.308451	0.950704
2850369	CDV3	1310	1420	985	881	1.6118	0.620423	0.922535
5900746	UBE2N	1280	1420	2690	2650	0.535849	1.8662	0.901408
7650523	ARPC3	1500	1410	1340	1350	1.04444	0.957447	1.06383
1770360	CCNB2	1460	1410	101	119	11.8487	0.0843972	1.03546
3120154	KIDINS220	1440	1410	5020	4580	0.30786	3.24823	1.02128
5560075	HSPC152	1430	1410	989	949	1.48577	0.67305	1.01418
5090168	ILF3	1410	1410	876	832	1.69471	0.590071	1
5360717	EFTUD2	1400	1410	934	870	1.62069	0.617021	0.992908
2940044	USP5	1380	1410	1200	1230	1.14634	0.87234	0.978723
3370730	MEIS1	1330	1410	491	529	2.66541	0.375177	0.943262
4920189	LTV1	1310	1410	956	918	1.53595	0.651064	0.929078
6960273	VCAN	1200	1410	705	821	1.71742	0.58227	0.851064
2070561	HGS	1570	1400	1610	1650	0.848485	1.17857	1.12143
4290114	NUSAP1	1470	1400	348	379	3.69393	0.270714	1.05
770707	KLHDC2	1460	1400	1440	1520	0.921053	1.08571	1.04286
1090332	CIRH1A	1390	1400	761	818	1.71149	0.584286	0.992857
6560228	PAIP2	1390	1400	1590	1700	0.823529	1.21429	0.992857
5220239	STMN1	1370	1400	1260	1130	1.23894	0.807143	0.978571
430687	RHOBTB3	1180	1400	747	837	1.67264	0.597857	0.842857
270243	DNAJB11	1730	1390	1560	1640	0.847561	1.17986	1.2446
5340392	MAN2A1	1430	1390	742	899	1.54616	0.646763	1.02878
160279	NOL5A	1410	1390	1090	1060	1.31132	0.76259	1.01439
4070224	MAD2L1	1370	1390	177	220	6.31818	0.158273	0.985612
6550612	COPS5	1350	1390	1170	1180	1.17797	0.848921	0.971223
7210162	NDUFA2	1330	1390	1440	1330	1.04511	0.956835	0.956835
2680221	FH	1300	1390	862	1020	1.36275	0.733813	0.935252
1940427	TNC	1250	1390	1880	1960	0.709184	1.41007	0.899281
5700403	WDR54	1240	1390	1180	1300	1.06923	0.935252	0.892086
4830072	STT3B	1230	1390	983	1040	1.33654	0.748201	0.884892
6620356	WEE1	1680	1380	275	294	4.69388	0.213043	1.21739
3450356	FAM50A	1660	1380	1000	1160	1.18966	0.84058	1.2029
5570524	CASP3	1650	1380	974	987	1.39818	0.715217	1.19565
1740154	CHD9	1450	1380	1910	2020	0.683168	1.46377	1.05072
5490445	EIF3K	1430	1380	910	935	1.47594	0.677536	1.03623
2680209	STK4	1420	1380	806	838	1.64678	0.607246	1.02899
7200458	TMED5	1360	1380	1070	1280	1.07812	0.927536	0.985507
3310368	ID3	1160	1380	366	366	3.77049	0.265217	0.84058
6960639	SLIT2	1080	1380	214	256	5.39062	0.185507	0.782609
6200017	GOT1	1690	1370	2290	2100	0.652381	1.53285	1.23358
3520168	KIAA0174	1500	1370	1260	1310	1.0458	0.956204	1.09489
670711	MED22	1480	1370	1100	977	1.40225	0.713139	1.08029
1500646	39706	1480	1370	1260	1420	0.964789	1.0365	1.08029
6770711	REEP5	1370	1370	4150	4010	0.341646	2.92701	1
6660414	CEP55	1360	1370	121	129	10.6202	0.0941606	0.992701
6980767	NDUFA8	1300	1370	1300	1420	0.964789	1.0365	0.948905
6980129	PGK1	1280	1370	1270	1360	1.00735	0.992701	0.934307
6450050	KCTD10	1220	1370	449	379	3.61478	0.276642	0.890511
3930437	GTF3C2	1190	1370	791	778	1.76093	0.567883	0.868613
7400341	PSMD1	1180	1370	1220	1050	1.30476	0.766423	0.861314
1690184	ANKRD30B	1150	1370	2410	2140	0.640187	1.56204	0.839416
7570360	C3ORF32	1850	1360	1	1	1360	0.000735294	1.36029
4730300	RBM5	1430	1360	2110	2000	0.68	1.47059	1.05147
1050379	ACTL6A	1350	1360	334	340	4	0.25	0.992647
5290100	NCBP2	1340	1360	1540	1490	0.912752	1.09559	0.985294
3840563	CAP2	1330	1360	975	1120	1.21429	0.823529	0.977941
290156	RAB5B	1310	1360	1740	1790	0.759777	1.31618	0.963235
6770369	NDUFB10	1270	1360	1110	1040	1.30769	0.764706	0.933824
2120576	RBBP7	1260	1360	850	826	1.64649	0.607353	0.926471
2140750	HNRPH3	1160	1360	1320	1250	1.088	0.919118	0.852941
1570364	SLC35B1	1530	1350	1480	1320	1.02273	0.977778	1.13333
7380170	IDH3B	1480	1350	1360	1270	1.06299	0.940741	1.0963
2650040	PRPSAP2	1420	1350	1220	1140	1.18421	0.844444	1.05185
6420392	POLR1D	1410	1350	993	1130	1.19469	0.837037	1.04444
1440433	BXDC2	1360	1350	701	669	2.01794	0.495556	1.00741
2470202	ASH2L	1320	1350	1080	1120	1.20536	0.82963	0.977778
5690390	RAB10	1280	1350	1570	1500	0.9	1.11111	0.948148
4050537	C20ORF43	1270	1350	1380	1160	1.16379	0.859259	0.940741
2360220	PIK3R2	1270	1350	2880	3090	0.436893	2.28889	0.940741
7150017	CCT7	1130	1350	690	691	1.95369	0.511852	0.837037
4830551	NEFL	982	1350	639	508	2.65748	0.376296	0.727407
2940068	ERRFI1	1520	1340	730	636	2.10692	0.474627	1.13433
1510736	TXNDC12	1470	1340	1000	1110	1.20721	0.828358	1.09701
940100	LTA4H	1380	1340	1300	1200	1.11667	0.895522	1.02985
1820097	PSMD10	1320	1340	1980	1860	0.72043	1.38806	0.985075
6450041	PSMC6	1260	1340	968	972	1.3786	0.725373	0.940299
4250093	ATP2A2	1260	1340	1010	1010	1.32673	0.753731	0.940299
2450170	MAP4K4	1220	1340	1490	1470	0.911565	1.09701	0.910448
510332	YAP1	1190	1340	638	770	1.74026	0.574627	0.88806
6520327	LEPROTL1	1180	1340	1050	1100	1.21818	0.820896	0.880597
6420026	SLC39A6	1090	1340	1370	1330	1.00752	0.992537	0.813433
2000528	SDCBP	1430	1330	1080	1140	1.16667	0.857143	1.07519
3940543	HARS	1420	1330	1290	1200	1.10833	0.902256	1.06767
3990451	COMMD1	1390	1330	1180	1260	1.05556	0.947368	1.04511
3360504	MBD4	1370	1330	1150	1060	1.25472	0.796992	1.03008
5090487	ACADVL	1350	1330	3430	3150	0.422222	2.36842	1.01504
2360458	TMEM14B	1300	1330	947	965	1.37824	0.725564	0.977444
2070494	ILF3	1260	1330	1120	989	1.34479	0.743609	0.947368
4880670	MTPN	1240	1330	1490	1280	1.03906	0.962406	0.932331
1510523	PTGES3	1190	1330	802	1030	1.29126	0.774436	0.894737
7050661	YES1	1100	1330	701	814	1.63391	0.61203	0.827068
2970332	RBM14	1080	1330	713	757	1.75694	0.569173	0.81203
4230538	LDLR	987	1330	765	674	1.97329	0.506767	0.742105
5290364	SPRED1	1520	1320	1020	1070	1.23364	0.810606	1.15152
2030452	DDX42	1490	1320	1010	954	1.38365	0.722727	1.12879
7210255	PMPCB	1460	1320	673	799	1.65207	0.605303	1.10606
2690181	SERF2	1440	1320	946	982	1.3442	0.743939	1.09091
240519	MRPL21	1420	1320	1040	935	1.41176	0.708333	1.07576
6290553	39514	1410	1320	1190	1260	1.04762	0.954545	1.06818
1070414	C19ORF43	1390	1320	1100	976	1.35246	0.739394	1.05303
5270349	CNOT2	1340	1320	1180	1100	1.2	0.833333	1.01515
1190470	FNBP1	1310	1320	1520	1530	0.862745	1.15909	0.992424
4120348	FRG1	1300	1320	797	854	1.54567	0.64697	0.984848
4490093	PLD3	1290	1320	2070	2020	0.653465	1.5303	0.977273
6450021	C1ORF77	1180	1320	1010	1070	1.23364	0.810606	0.893939
4590082	PRPF8	1710	1310	806	760	1.72368	0.580153	1.30534
5860553	AUTS2	1400	1310	2740	2690	0.486989	2.05344	1.0687
4280520	MARS	1290	1310	770	694	1.88761	0.529771	0.984733
3180497	RSRC2	1290	1310	1210	1150	1.13913	0.877863	0.984733
5270327	CYFIP1	1280	1310	774	882	1.48526	0.673282	0.977099
2340563	FBL	1250	1310	473	458	2.86026	0.349618	0.954198
3370445	TJP1	1240	1310	940	1010	1.29703	0.770992	0.946565
7200161	ASCC3	1200	1310	554	645	2.03101	0.492366	0.916031
1690730	COL4A5	1200	1310	1050	1140	1.14912	0.870229	0.916031
2600747	SLC7A5	1850	1300	558	596	2.18121	0.458462	1.42308
1340192	C15ORF15	1490	1300	934	848	1.53302	0.652308	1.14615
290707	SRRM1	1490	1300	1250	1290	1.00775	0.992308	1.14615
6940008	GATAD2A	1470	1300	484	448	2.90179	0.344615	1.13077
7100064	COX7A2L	1370	1300	1630	1390	0.935252	1.06923	1.05385
3830747	PNN	1340	1300	1060	964	1.34855	0.741538	1.03077
3800333	GLOD4	1320	1300	1060	1050	1.2381	0.807692	1.01538
380537	ERAL1	1300	1300	1190	1070	1.21495	0.823077	1
3420041	SMARCE1	1290	1300	939	878	1.48064	0.675385	0.992308
2450519	MCM3	1220	1300	337	351	3.7037	0.27	0.938462
1410315	SF3B14	1220	1300	796	886	1.46727	0.681538	0.938462
6370487	SLC35A5	1160	1300	1430	1440	0.902778	1.10769	0.892308
1850202	LSS	1040	1300	1830	1540	0.844156	1.18462	0.8
4920162	TFG	1490	1290	969	1010	1.27723	0.782946	1.15504
5360538	C6ORF166	1370	1290	1050	982	1.31365	0.76124	1.06202
6860327	CDC23	1340	1290	923	956	1.34937	0.741085	1.03876
5890747	ARL2	1330	1290	1640	1660	0.777108	1.28682	1.03101
3440400	DCUN1D5	1300	1290	707	726	1.77686	0.562791	1.00775
6220452	STK35	1280	1290	996	902	1.43016	0.699225	0.992248
3130397	CAPZA2	1280	1290	1700	1780	0.724719	1.37984	0.992248
6020332	MRFAP1L1	1280	1290	2170	2060	0.626214	1.5969	0.992248
4200612	EML4	1260	1290	913	910	1.41758	0.705426	0.976744
1980541	METAP1	1220	1290	973	780	1.65385	0.604651	0.945736
3120082	C10ORF58	1070	1290	2270	2120	0.608491	1.64341	0.829457
1710541	ZFR	1010	1290	1240	1410	0.914894	1.09302	0.782946
6250445	SPRY2	1490	1280	416	451	2.83814	0.352344	1.16406
240561	POLR2H	1450	1280	1010	890	1.4382	0.695312	1.13281
5910139	PRMT1	1440	1280	704	689	1.85776	0.538281	1.125
110398	C1ORF43	1370	1280	1320	1300	0.984615	1.01562	1.07031
3130458	ZNF664	1320	1280	819	905	1.41436	0.707031	1.03125
6980082	RPL22	1320	1280	1920	1970	0.649746	1.53906	1.03125
4730100	LOC440093	1210	1280	1230	1110	1.15315	0.867188	0.945312
4880494	PRKRIR	1210	1280	1090	1130	1.13274	0.882812	0.945312
2350358	BCL2L1	1130	1280	1070	1090	1.17431	0.851562	0.882812
270468	FKBP1A	1110	1280	997	918	1.39434	0.717187	0.867188
6020543	AMZ2	1090	1280	1120	1150	1.11304	0.898438	0.851562
4230088	ALPP	699	1280	2260	1720	0.744186	1.34375	0.546094
3120750	HNRPDL	1660	1270	1930	1580	0.803797	1.24409	1.30709
1170131	C12ORF41	1540	1270	1330	1230	1.03252	0.968504	1.2126
6270092	DTL	1520	1270	220	243	5.22634	0.191339	1.19685
6380463	ACTR1A	1510	1270	1660	1790	0.709497	1.40945	1.18898
7160546	PCID2	1340	1270	1320	1320	0.962121	1.03937	1.05512
2900131	AP3B1	1330	1270	381	440	2.88636	0.346457	1.04724
1300768	AKR1A1	1180	1270	1010	1040	1.22115	0.818898	0.929134
4540551	IGFBP3	1170	1270	280	405	3.1358	0.318898	0.92126
5720497	PSMD2	1170	1270	1020	858	1.48019	0.675591	0.92126
5050370	FAM129B	1090	1270	401	512	2.48047	0.40315	0.858268
3370059	BTG3	1560	1260	1180	1170	1.07692	0.928571	1.2381
160240	DDX39	1470	1260	739	741	1.7004	0.588095	1.16667
1090400	RPL7A	1370	1260	709	729	1.7284	0.578571	1.0873
1820253	CGGBP1	1330	1260	1640	1710	0.736842	1.35714	1.05556
3710477	C13ORF23	1320	1260	653	674	1.86944	0.534921	1.04762
6130717	PHPT1	1250	1260	1020	999	1.26126	0.792857	0.992063
2810343	HEATR2	1190	1260	791	829	1.5199	0.657937	0.944444
2810594	PRDX4	1190	1260	953	1060	1.18868	0.84127	0.944444
1070424	VBP1	1190	1260	1390	1250	1.008	0.992063	0.944444
2450347	RAB7A	1190	1260	2020	2090	0.602871	1.65873	0.944444
5860364	FABP7	1170	1260	4870	5200	0.242308	4.12698	0.928571
650520	UNC50	1130	1260	1180	1280	0.984375	1.01587	0.896825
1580368	COL6A3	1080	1260	1050	1360	0.926471	1.07937	0.857143
1230528	HSPH1	1390	1250	1780	1740	0.718391	1.392	1.112
1170671	TMED3	1390	1250	1840	1870	0.668449	1.496	1.112
130338	ZDHHC16	1350	1250	1210	1290	0.968992	1.032	1.08
4200719	TSC22D1	1270	1250	1690	1560	0.801282	1.248	1.016
110192	CTTN	1240	1250	872	748	1.67112	0.5984	0.992
630400	SDHB	1230	1250	1190	1220	1.02459	0.976	0.984
2470053	ENC1	1170	1250	1660	1740	0.718391	1.392	0.936
6380731	DYNLT1	1120	1250	1650	1690	0.739645	1.352	0.896
4290376	RHOB	1100	1250	1290	1400	0.892857	1.12	0.88
6220139	SS18	1080	1250	681	687	1.81951	0.5496	0.864
6020241	UBP1	1060	1250	1080	1150	1.08696	0.92	0.848
6040201	CTNNB1	1050	1250	729	658	1.8997	0.5264	0.84
2600731	SLC38A2	2100	1240	772	755	1.64238	0.608871	1.69355
1500494	NOP5/NOP58	1390	1240	554	547	2.26691	0.441129	1.12097
2320215	XPO1	1310	1240	1030	1110	1.11712	0.895161	1.05645
940521	GPM6B	1240	1240	5010	4820	0.257261	3.8871	1
5810484	NUDT5	1230	1240	459	451	2.74945	0.36371	0.991935
4760192	PACSIN2	1210	1240	653	664	1.86747	0.535484	0.975806
20450	MDC1	1160	1240	556	636	1.94969	0.512903	0.935484
4230551	DYNLRB1	1140	1240	1460	1600	0.775	1.29032	0.919355
4120358	RNASEN	1130	1240	998	894	1.38702	0.720968	0.91129
540348	C14ORF135	1110	1240	2020	1830	0.677596	1.47581	0.895161
3290411	HSD17B12	1060	1240	1660	1760	0.704545	1.41935	0.854839
6860022	ST13	989	1240	1350	1330	0.932331	1.07258	0.797581
6580075	NFE2L2	1680	1230	632	713	1.72511	0.579675	1.36585
1710100	ARHGAP17	1410	1230	934	782	1.57289	0.635772	1.14634
4070138	GNL3	1350	1230	849	701	1.75464	0.569919	1.09756
130008	TAF7	1320	1230	1060	999	1.23123	0.812195	1.07317
620100	ZNF521	1260	1230	2230	2200	0.559091	1.78862	1.02439
110128	LOC729843	1250	1230	1510	1550	0.793548	1.26016	1.01626
1580379	GTF2F2	1230	1230	958	971	1.26674	0.789431	1
6900685	LOC730994	1230	1230	2610	2490	0.493976	2.02439	1
1440546	GOT2	1200	1230	1540	1260	0.97619	1.02439	0.97561
7550070	ATP5G1	1160	1230	1120	1010	1.21782	0.821138	0.943089
1470242	WDFY1	1130	1230	1130	1270	0.968504	1.03252	0.918699
6420446	S100A10	1070	1230	174	227	5.4185	0.184553	0.869919
990224	UBQLN4	1060	1230	1030	955	1.28796	0.776423	0.861789
4010446	AKAP12	1010	1230	349	456	2.69737	0.370732	0.821138
5720292	TCF12	1000	1230	717	772	1.59326	0.627642	0.813008
5910376	THBS1	1540	1220	289	405	3.01235	0.331967	1.2623
450474	PLRG1	1340	1220	730	761	1.60315	0.62377	1.09836
1050544	AKR7A2	1290	1220	732	812	1.50246	0.665574	1.05738
2600706	RAB6IP1	1290	1220	1890	1860	0.655914	1.52459	1.05738
3710368	TRIM28	1260	1220	501	474	2.57384	0.388525	1.03279
1090491	MID1	1240	1220	642	634	1.92429	0.519672	1.01639
6960333	CYFIP2	1230	1220	1330	1360	0.897059	1.11475	1.0082
630563	DCTN3	1170	1220	1840	1670	0.730539	1.36885	0.959016
4150113	RRAGA	1090	1220	2000	1950	0.625641	1.59836	0.893443
2120487	JARID2	1040	1220	785	652	1.87117	0.534426	0.852459
6770746	FXR1	1480	1210	832	821	1.47381	0.678512	1.22314
6130674	TXNIP	1440	1210	702	796	1.5201	0.657851	1.19008
6220487	C2ORF28	1240	1210	1200	1350	0.896296	1.1157	1.02479
4280332	DDX24	1240	1210	2020	2020	0.59901	1.66942	1.02479
1780270	EIF1AY	1230	1210	617	702	1.72365	0.580165	1.01653
4560630	BTF3L4	1230	1210	1270	1210	1	1	1.01653
5900021	WDR6	1230	1210	2050	1900	0.636842	1.57025	1.01653
4920170	C7ORF30	1200	1210	1020	1090	1.11009	0.900826	0.991736
1010575	CPSF3	1160	1210	497	478	2.53138	0.395041	0.958678
1850327	STAU1	1120	1210	1120	1240	0.975806	1.02479	0.92562
4260754	EFHA1	1090	1210	1620	1410	0.858156	1.16529	0.900826
3610390	JARID1B	1020	1210	1090	1060	1.14151	0.876033	0.842975
5090553	PPT1	1290	1200	1370	1510	0.794702	1.25833	1.075
580427	GTF2E2	1260	1200	899	807	1.48699	0.6725	1.05
7380427	ZNF828	1220	1200	822	835	1.43713	0.695833	1.01667
5670017	ZNF512	1220	1200	1520	1780	0.674157	1.48333	1.01667
5420731	MAP3K7	1200	1200	721	722	1.66205	0.601667	1
4010037	HAT1	1180	1200	533	623	1.92616	0.519167	0.983333
6020685	OSBPL9	1180	1200	871	818	1.46699	0.681667	0.983333
4480019	TNFRSF19	1110	1200	1020	1060	1.13208	0.883333	0.925
1980647	HMGB3	1090	1200	1070	1130	1.06195	0.941667	0.908333
2060279	PAK2	1050	1200	1230	1230	0.97561	1.025	0.875
1260538	HSD17B4	1040	1200	1520	1550	0.774194	1.29167	0.866667
1170482	UBQLN2	987	1200	1940	1970	0.609137	1.64167	0.8225
7150048	FST	862	1200	33.8	34.6	34.6821	0.0288333	0.718333
4040753	WSCD1	860	1200	1090	1030	1.16505	0.858333	0.716667
4920273	DDX18	1270	1190	941	802	1.48379	0.67395	1.06723
3360349	CLIP3	1250	1190	4130	4050	0.293827	3.40336	1.05042
6560692	ATXN2	1190	1190	1590	1610	0.73913	1.35294	1
2600008	ARPP-19	1170	1190	1130	996	1.19478	0.836975	0.983193
6370639	ZDHHC7	1160	1190	971	945	1.25926	0.794118	0.97479
7650356	RHOQ	1160	1190	1170	1200	0.991667	1.0084	0.97479
380068	RNF34	1140	1190	1170	1200	0.991667	1.0084	0.957983
1050711	NUP153	1050	1190	1030	971	1.22554	0.815966	0.882353
1170328	LAMB1	1040	1190	286	292	4.07534	0.245378	0.87395
5420221	RAN	992	1190	1430	1310	0.908397	1.10084	0.833613
5890037	RYK	986	1190	648	728	1.63462	0.611765	0.828571
6400603	PBX3	970	1190	4650	4610	0.258134	3.87395	0.815126
650110	GNA11	1450	1180	1420	1470	0.802721	1.24576	1.22881
7320014	MYL6B	1380	1180	1720	1700	0.694118	1.44068	1.16949
5090725	FIBP	1300	1180	1320	1200	0.983333	1.01695	1.10169
6840487	ATP1B3	1270	1180	1480	1610	0.732919	1.36441	1.07627
3360022	PPP2R5E	1260	1180	1140	973	1.21274	0.824576	1.0678
2600255	KIAA1967	1210	1180	952	1000	1.18	0.847458	1.02542
7150176	ATOX1	1210	1180	1110	1080	1.09259	0.915254	1.02542
4060202	MAPRE2	1170	1180	1580	1500	0.786667	1.27119	0.991525
460561	RNF181	1150	1180	594	631	1.87005	0.534746	0.974576
2570139	SFRS7	1150	1180	1160	1350	0.874074	1.14407	0.974576
4120070	ACO1	1140	1180	822	880	1.34091	0.745763	0.966102
6510041	LOC647349	1020	1180	1370	1510	0.781457	1.27966	0.864407
4920204	BAZ1A	979	1180	433	426	2.76995	0.361017	0.829661
5890110	APCDD1	633	1180	1150	1110	1.06306	0.940678	0.536441
5260397	KLF6	1910	1170	1390	1340	0.873134	1.1453	1.63248
1470392	FYN	1250	1170	1930	1950	0.6	1.66667	1.06838
3850435	TIMM23	1230	1170	824	907	1.28997	0.775214	1.05128
6060707	CSTB	1220	1170	1230	1200	0.975	1.02564	1.04274
3440411	HSPA1B	1170	1170	1200	1100	1.06364	0.940171	1
1110100	STT3A	1130	1170	594	658	1.77812	0.562393	0.965812
2230376	CDK2	1120	1170	262	281	4.1637	0.240171	0.957265
2760349	DDEF1	1100	1170	831	912	1.28289	0.779487	0.940171
5550195	CST3	1090	1170	1740	1970	0.593909	1.68376	0.931624
4880181	RIC8A	1080	1170	1290	1230	0.95122	1.05128	0.923077
2750707	PSMD6	1060	1170	714	706	1.65722	0.603419	0.905983
1070020	NDUFA6	1060	1170	1120	1050	1.11429	0.897436	0.905983
20202	FAM64A	1040	1170	99.2	88.6	13.2054	0.0757265	0.888889
3310168	LRAT	1010	1170	1	1	1170	0.000854701	0.863248
3990364	CEBPG	1550	1160	1090	1160	1	1	1.33621
1440746	RAB5A	1330	1160	1540	1530	0.75817	1.31897	1.14655
6480358	U2AF2	1280	1160	748	763	1.52031	0.657759	1.10345
4490747	ZNF313	1210	1160	1110	1060	1.09434	0.913793	1.0431
780133	SAFB	1170	1160	755	809	1.43387	0.697414	1.00862
6560465	CXXC5	1170	1160	819	897	1.2932	0.773276	1.00862
6760255	CYP1B1	1130	1160	300	404	2.87129	0.348276	0.974138
6760553	PCNP	1110	1160	1200	1280	0.90625	1.10345	0.956897
2640291	VTA1	1090	1160	1590	1690	0.686391	1.4569	0.939655
6510575	DICER1	1030	1160	1270	1130	1.02655	0.974138	0.887931
4480008	KPNA3	1020	1160	1130	1180	0.983051	1.01724	0.87931
5910326	CNOT7	902	1160	517	532	2.18045	0.458621	0.777586
5260762	MAMDC2	886	1160	144	169	6.86391	0.14569	0.763793
4670070	FAM44B	1410	1150	794	900	1.27778	0.782609	1.22609
1300192	ABCF1	1340	1150	844	803	1.43213	0.698261	1.16522
6110646	MYST3	1330	1150	1620	1420	0.809859	1.23478	1.15652
7400286	TBPL1	1270	1150	1080	1120	1.02679	0.973913	1.10435
4920180	CMTM7	1210	1150	1	1	1150	0.000869565	1.05217
5360703	CNIH	1210	1150	795	828	1.38889	0.72	1.05217
5910274	C2ORF29	1190	1150	649	647	1.77743	0.562609	1.03478
2470463	GPBP1	1140	1150	1220	1120	1.02679	0.973913	0.991304
7380167	DVL3	1120	1150	1230	1180	0.974576	1.02609	0.973913
4920347	DOCK7	1090	1150	881	951	1.20925	0.826957	0.947826
1980519	MBTPS1	1010	1150	992	984	1.1687	0.855652	0.878261
3420148	CLDND1	1010	1150	2030	2070	0.555556	1.8	0.878261
5420717	EIF4EBP2	1000	1150	417	416	2.76442	0.361739	0.869565
7160441	UBQLN1	1340	1140	1210	1280	0.890625	1.12281	1.17544
3610612	ASCC2	1260	1140	816	949	1.20126	0.832456	1.10526
510497	KDELR2	1240	1140	707	599	1.90317	0.525439	1.08772
3390551	TMEM32	1230	1140	1660	1520	0.75	1.33333	1.07895
6370187	CLINT1	1200	1140	949	1060	1.07547	0.929825	1.05263
7650605	KCTD17	1200	1140	1670	1420	0.802817	1.24561	1.05263
2480176	FADS1	1170	1140	651	707	1.61245	0.620175	1.02632
5270280	DENND2A	1160	1140	822	844	1.35071	0.740351	1.01754
2850398	MKI67IP	1150	1140	1010	1070	1.06542	0.938596	1.00877
940470	NOL11	1120	1140	764	730	1.56164	0.640351	0.982456
6400403	LOC203547	1120	1140	1390	1270	0.897638	1.11404	0.982456
5910093	XPR1	1110	1140	1270	1330	0.857143	1.16667	0.973684
2100189	MRPL32	1070	1140	967	928	1.22845	0.814035	0.938596
1230463	M-RIP	1070	1140	1090	1020	1.11765	0.894737	0.938596
830437	SMC4	1050	1140	270	283	4.02827	0.248246	0.921053
380019	SEPHS1	1050	1140	793	792	1.43939	0.694737	0.921053
6040445	NUP160	996	1140	735	812	1.40394	0.712281	0.873684
1010201	ZNF622	1360	1130	1160	1250	0.904	1.10619	1.20354
5960424	C12ORF10	1310	1130	1120	1160	0.974138	1.02655	1.15929
2340338	TAX1BP1	1290	1130	1010	1010	1.11881	0.893805	1.14159
1770279	ARPC5L	1260	1130	758	697	1.62123	0.616814	1.11504
3450196	SURF4	1210	1130	687	698	1.61891	0.617699	1.0708
3710131	CMIP	1200	1130	3690	3870	0.29199	3.42478	1.06195
2100021	DMTF1	1180	1130	1330	1220	0.92623	1.07965	1.04425
5560523	PLOD1	1140	1130	693	804	1.40547	0.711504	1.00885
7400402	NUDT1	1110	1130	284	302	3.74172	0.267257	0.982301
940278	ILK	1080	1130	542	558	2.02509	0.493805	0.955752
6770053	WDR57	1060	1130	604	486	2.3251	0.430088	0.938053
6840121	STIP1	1060	1130	536	500	2.26	0.442478	0.938053
1710477	IDH2	1060	1130	739	649	1.74114	0.574336	0.938053
4180470	TSPAN13	1050	1130	2120	2100	0.538095	1.85841	0.929204
7100674	GNG5	1040	1130	274	284	3.97887	0.251327	0.920354
5860477	EDG3	1030	1130	670	713	1.58485	0.630973	0.911504
70347	CCT6A	1000	1130	613	730	1.54795	0.646018	0.884956
5290333	MAGED2	988	1130	708	657	1.71994	0.581416	0.874336
70132	LEPREL1	1310	1120	85.1	118	9.49153	0.105357	1.16964
6290431	EIF3G	1210	1120	857	842	1.33017	0.751786	1.08036
1430743	CYC1	1210	1120	877	850	1.31765	0.758929	1.08036
4280463	RTN3	1190	1120	5570	5060	0.221344	4.51786	1.0625
5290075	NSMCE4A	1180	1120	486	531	2.10923	0.474107	1.05357
3360156	LRRN1	1150	1120	539	533	2.10131	0.475893	1.02679
4290154	NOL6	1110	1120	1060	925	1.21081	0.825893	0.991071
730470	YPEL5	1110	1120	1780	1650	0.678788	1.47321	0.991071
1440397	BUB1	1090	1120	104	124	9.03226	0.110714	0.973214
4210465	CNOT7	1080	1120	706	768	1.45833	0.685714	0.964286
4570162	GSTO1	1050	1120	335	355	3.15493	0.316964	0.9375
2750730	TRIB2	1050	1120	2290	2110	0.530806	1.88393	0.9375
7400239	IWS1	1010	1120	840	839	1.33492	0.749107	0.901786
7550224	COTL1	944	1120	189	165	6.78788	0.147321	0.842857
7380181	LRRN3	647	1120	1710	2000	0.56	1.78571	0.577679
6280575	DNAJA3	1180	1110	903	941	1.1796	0.847748	1.06306
830341	C18ORF10	1170	1110	1340	1330	0.834586	1.1982	1.05405
3290576	PARL	1160	1110	674	667	1.66417	0.600901	1.04505
1070041	CAMLG	1160	1110	2080	2040	0.544118	1.83784	1.04505
6590300	HSD17B10	1140	1110	625	610	1.81967	0.54955	1.02703
4250719	BMS1	1130	1110	627	594	1.86869	0.535135	1.01802
6560377	KPNA4	1130	1110	1300	1340	0.828358	1.20721	1.01802
6330400	CBX2	1120	1110	282	283	3.92226	0.254955	1.00901
20274	ADIPOR2	1100	1110	1100	1070	1.03738	0.963964	0.990991
730446	HECTD1	1090	1110	1450	1340	0.828358	1.20721	0.981982
5900193	NUP88	1060	1110	455	457	2.42888	0.411712	0.954955
4210494	KLHL9	1060	1110	1340	1380	0.804348	1.24324	0.954955
3060546	TRIM33	1050	1110	1600	1540	0.720779	1.38739	0.945946
830093	GGH	1020	1110	903	1050	1.05714	0.945946	0.918919
510196	SKP1A	1020	1110	2000	1920	0.578125	1.72973	0.918919
1660025	KIAA0528	1010	1110	1680	1630	0.680982	1.46847	0.90991
4390092	KLHDC5	1010	1110	1740	1790	0.620112	1.61261	0.90991
6510647	WDR82	980	1110	1650	1600	0.69375	1.44144	0.882883
270093	NIPA2	1250	1100	1130	1100	1	1	1.13636
7330546	UBE3A	1140	1100	770	724	1.51934	0.658182	1.03636
4570202	SCAP	1140	1100	1840	1620	0.679012	1.47273	1.03636
3130564	NCALD	1130	1100	1470	1370	0.80292	1.24545	1.02727
10593	PTDSS1	1120	1100	1800	1770	0.621469	1.60909	1.01818
6760154	RSL1D1	1110	1100	608	505	2.17822	0.459091	1.00909
2630600	WDR40A	1090	1100	810	787	1.39771	0.715455	0.990909
5960301	C21ORF33	1090	1100	1050	1080	1.01852	0.981818	0.990909
3800520	H3F3B	1090	1100	1710	1670	0.658683	1.51818	0.990909
2710392	NOL1	1080	1100	763	735	1.4966	0.668182	0.981818
1580528	SERPINB6	1050	1100	1790	1890	0.582011	1.71818	0.954545
3170722	MST4	1030	1100	81.1	88.7	12.4014	0.0806364	0.936364
6130754	CXCR4	981	1100	2330	2480	0.443548	2.25455	0.891818
5960386	LEPREL2	1360	1090	537	549	1.98543	0.50367	1.24771
3390767	ADNP2	1270	1090	749	710	1.53521	0.651376	1.16514
3930148	NDUFB5	1240	1090	938	1050	1.0381	0.963303	1.13761
3940379	SLC30A7	1160	1090	814	763	1.42857	0.7	1.06422
5910762	NPC2	1150	1090	1730	1710	0.637427	1.56881	1.05505
270722	CAPZB	1130	1090	412	517	2.10832	0.474312	1.0367
5720086	C6ORF153	1120	1090	480	571	1.90893	0.523853	1.02752
5260615	LPL	1110	1090	221	185	5.89189	0.169725	1.01835
2630259	AP2S1	1090	1090	757	743	1.46703	0.681651	1
610762	PRPF4	1070	1090	653	603	1.80763	0.553211	0.981651
6480674	NKTR	1050	1090	1180	1260	0.865079	1.15596	0.963303
130520	LOC387820	1040	1090	2120	2310	0.471861	2.11927	0.954128
2640709	MTDH	1030	1090	767	833	1.30852	0.76422	0.944954
990288	C5ORF15	995	1090	872	790	1.37975	0.724771	0.912844
7200253	MRPL36	994	1090	1130	966	1.12836	0.886239	0.911927
2600768	THY1	971	1090	1010	1070	1.01869	0.981651	0.890826
3120184	SRF	969	1090	706	601	1.81364	0.551376	0.888991
7380390	COL1A1	965	1090	1140	1770	0.615819	1.62385	0.885321
2120315	OAF	951	1090	34.4	44.3	24.605	0.0406422	0.872477
1710093	SQLE	748	1090	1000	947	1.151	0.868807	0.686239
7210390	RABGGTB	1500	1080	785	775	1.39355	0.717593	1.38889
4640563	DUSP12	1460	1080	1230	1230	0.878049	1.13889	1.35185
380543	CHSY1	1240	1080	583	751	1.43808	0.69537	1.14815
6760441	OSBP	1230	1080	1170	1230	0.878049	1.13889	1.13889
5910349	EEF1E1	1110	1080	899	988	1.09312	0.914815	1.02778
4480364	SYPL1	1100	1080	712	726	1.4876	0.672222	1.01852
110326	DCAKD	1070	1080	926	1030	1.04854	0.953704	0.990741
6840192	EIF3B	1030	1080	544	522	2.06897	0.483333	0.953704
940113	TOMM22	1020	1080	637	623	1.73355	0.576852	0.944444
3890475	ATP6V1A	1010	1080	2730	2940	0.367347	2.72222	0.935185
6650411	SNX19	1000	1080	1130	1120	0.964286	1.03704	0.925926
1570202	SEPW1	984	1080	2410	2530	0.426877	2.34259	0.911111
520615	DRG1	982	1080	641	614	1.75896	0.568519	0.909259
4070025	EXOC1	971	1080	1650	1640	0.658537	1.51852	0.899074
160196	XRCC6	925	1080	467	460	2.34783	0.425926	0.856481
1710471	SPTBN1	910	1080	1310	1370	0.788321	1.26852	0.842593
3990176	PROSC	901	1080	960	1010	1.06931	0.935185	0.834259
450544	DUSP3	1350	1070	777	773	1.38422	0.72243	1.26168
6270274	COPG	1320	1070	987	931	1.1493	0.870093	1.23364
620300	POFUT2	1230	1070	830	823	1.30012	0.769159	1.14953
580176	SUGT1	1140	1070	585	569	1.88049	0.531776	1.06542
3870739	VPS35	1140	1070	897	1100	0.972727	1.02804	1.06542
3610519	NDUFA3	1140	1070	1180	1210	0.884298	1.13084	1.06542
3940523	C6ORF62	1140	1070	1410	1480	0.722973	1.38318	1.06542
5700088	NCSTN	1090	1070	977	955	1.12042	0.892523	1.01869
4610433	TSEN34	1070	1070	729	741	1.44399	0.692523	1
1240465	ISCA2	1070	1070	1140	1160	0.922414	1.08411	1
2900035	SNX27	1010	1070	1620	1500	0.713333	1.40187	0.943925
6110619	MRPL13	1000	1070	502	574	1.86411	0.536449	0.934579
3370450	PHIP	973	1070	823	831	1.28761	0.776636	0.909346
1430730	GART	929	1070	374	428	2.5	0.4	0.868224
6860494	F2R	777	1070	388	435	2.45977	0.406542	0.726168
2060192	EPHA2	1370	1060	61.6	57.6	18.4028	0.0543396	1.29245
3400372	FBXO21	1120	1060	1610	1620	0.654321	1.5283	1.0566
6020181	CNPY2	1110	1060	845	843	1.25741	0.795283	1.04717
360053	INPP5A	1090	1060	672	706	1.50142	0.666038	1.0283
3140202	NCK2	1080	1060	762	838	1.26492	0.790566	1.01887
2810110	TM9SF2	1050	1060	1050	1100	0.963636	1.03774	0.990566
1940538	POLR2I	1020	1060	1180	1130	0.938053	1.06604	0.962264
2600097	ANKRD17	1020	1060	1140	1140	0.929825	1.07547	0.962264
4060605	CD44	1020	1060	1090	1570	0.675159	1.48113	0.962264
6400711	SPCS2	1010	1060	971	1030	1.02913	0.971698	0.95283
1110110	PTPLAD1	978	1060	851	828	1.28019	0.781132	0.922642
1980743	EXOSC3	975	1060	386	436	2.43119	0.411321	0.919811
1580010	TRIP12	968	1060	798	767	1.38201	0.723585	0.913208
360343	FEZ1	966	1060	2110	1870	0.566845	1.76415	0.911321
5340484	CDC2	964	1060	129	147	7.21088	0.138679	0.909434
4070070	C22ORF13	949	1060	449	418	2.53589	0.39434	0.895283
2490440	RALB	926	1060	513	535	1.98131	0.504717	0.873585
5860021	RBM12	926	1060	894	860	1.23256	0.811321	0.873585
870397	ZMAT3	887	1060	1760	1650	0.642424	1.5566	0.836792
520465	CSTF3	840	1060	288	298	3.55705	0.281132	0.792453
1190170	TMEM93	1190	1050	908	836	1.25598	0.79619	1.13333
1170400	C12ORF57	1140	1050	1060	1020	1.02941	0.971429	1.08571
1400192	CCDC6	1140	1050	1550	1640	0.640244	1.5619	1.08571
4180544	TIAL1	1130	1050	688	698	1.5043	0.664762	1.07619
1510669	PCGF2	1110	1050	1240	1260	0.833333	1.2	1.05714
5080324	LRIG3	1100	1050	146	176	5.96591	0.167619	1.04762
7610113	FNTA	1100	1050	825	793	1.32409	0.755238	1.04762
2260010	POMGNT1	1090	1050	1480	1520	0.690789	1.44762	1.0381
150148	ARID1A	1050	1050	814	913	1.15005	0.869524	1
2970195	DTNA	1040	1050	859	1060	0.990566	1.00952	0.990476
3850025	TAF1C	1040	1050	1790	1810	0.58011	1.72381	0.990476
1440470	TMEM106C	1030	1050	1030	1020	1.02941	0.971429	0.980952
290370	CHMP1B	958	1050	537	550	1.90909	0.52381	0.912381
1660520	PLEKHA5	914	1050	1620	1930	0.544041	1.8381	0.870476
6420477	PSMA6	913	1050	683	653	1.60796	0.621905	0.869524
4880431	PRDX2	906	1050	1030	1030	1.01942	0.980952	0.862857
1500564	ATP5F1	881	1050	902	978	1.07362	0.931429	0.839048
3190100	ADD3	834	1050	892	1160	0.905172	1.10476	0.794286
6960634	INSIG1	547	1050	2610	2260	0.464602	2.15238	0.520952
2120255	ACBD3	1350	1040	1230	1220	0.852459	1.17308	1.29808
60673	MLF2	1240	1040	1100	831	1.2515	0.799038	1.19231
70722	COX7B	1200	1040	757	868	1.19816	0.834615	1.15385
50348	STRA13	1130	1040	852	770	1.35065	0.740385	1.08654
2260520	EXOC7	1120	1040	1410	1500	0.693333	1.44231	1.07692
1780400	CTPS	1060	1040	633	644	1.61491	0.619231	1.01923
4730639	RABEPK	1060	1040	1090	1010	1.0297	0.971154	1.01923
4070360	PTBP2	1060	1040	1410	1360	0.764706	1.30769	1.01923
7330377	KPNA2	1050	1040	460	562	1.85053	0.540385	1.00962
3850286	TRRAP	1050	1040	966	1030	1.00971	0.990385	1.00962
4200328	PUS1	1040	1040	680	578	1.79931	0.555769	1
1710682	SKIV2L2	960	1040	564	528	1.9697	0.507692	0.923077
5050209	DECR1	954	1040	538	561	1.85383	0.539423	0.917308
7330224	C14ORF112	949	1040	894	861	1.2079	0.827885	0.9125
7400554	MN1	862	1040	1240	1320	0.787879	1.26923	0.828846
360671	MMD	848	1040	2520	2410	0.431535	2.31731	0.815385
7000041	GOLGA3	1420	1030	1490	1420	0.725352	1.37864	1.37864
7380056	TP53INP1	1080	1030	455	530	1.9434	0.514563	1.04854
6510725	SRM	1080	1030	807	708	1.4548	0.687379	1.04854
6450008	TMEM43	1080	1030	900	1060	0.971698	1.02913	1.04854
6200112	OGT	1080	1030	1870	1800	0.572222	1.74757	1.04854
5670707	TUBG1	1070	1030	756	739	1.39378	0.717476	1.03883
2030600	GLI3	1060	1030	134	153	6.73203	0.148544	1.02913
1190091	UQCRC1	1060	1030	914	779	1.32221	0.756311	1.02913
6510482	PDPN	1030	1030	853	875	1.17714	0.849515	1
520168	SLC35F1	1030	1030	1970	1910	0.539267	1.85437	1
2370451	NIF3L1	1010	1030	578	602	1.71096	0.584466	0.980583
1510692	CCND3	998	1030	869	855	1.20468	0.830097	0.968932
2230131	PTX3	996	1030	291	275	3.74545	0.26699	0.96699
6020164	PSMD7	952	1030	862	876	1.1758	0.850485	0.924272
770661	RASA1	946	1030	1140	1120	0.919643	1.08738	0.918447
5910528	MCM4	826	1030	467	468	2.20085	0.454369	0.801942
990072	MXRA5	653	1030	193	268	3.84328	0.260194	0.633981
3870615	STC2	1760	1020	44	74.8	13.6364	0.0733333	1.72549
2190445	NDUFB7	1200	1020	1060	826	1.23487	0.809804	1.17647
290646	RPL13	1200	1020	1410	1230	0.829268	1.20588	1.17647
2650070	MRPL37	1190	1020	483	478	2.13389	0.468627	1.16667
870424	RPL31	1180	1020	610	621	1.64251	0.608824	1.15686
2710239	LASS6	1100	1020	1780	1760	0.579545	1.72549	1.07843
3610541	FAM130A1	1100	1020	2090	2120	0.481132	2.07843	1.07843
6550142	LOC400455	1080	1020	525	507	2.01183	0.497059	1.05882
5340014	GPR98	1040	1020	474	433	2.35566	0.42451	1.01961
430537	BLOC1S1	1030	1020	907	872	1.16972	0.854902	1.0098
830725	SOX4	1020	1020	1690	1550	0.658065	1.51961	1
7560113	ZC3H7A	1010	1020	826	837	1.21864	0.820588	0.990196
3990221	PTPLB	973	1020	909	925	1.1027	0.906863	0.953922
4260561	RAB28	957	1020	879	927	1.10032	0.908824	0.938235
6290475	METTL5	922	1020	753	812	1.25616	0.796078	0.903922
4760327	CPE	915	1020	4190	4910	0.207739	4.81373	0.897059
2850630	EHD1	913	1020	845	840	1.21429	0.823529	0.895098
3310246	ESD	904	1020	564	631	1.61648	0.618627	0.886275
2190201	FZD3	896	1020	1110	1140	0.894737	1.11765	0.878431
150703	ATF3	3790	1010	564	525	1.92381	0.519802	3.75248
1430324	CNTFR	1230	1010	720	596	1.69463	0.590099	1.21782
4850138	RAE1	1130	1010	487	499	2.02405	0.494059	1.11881
7150113	SNX2	1120	1010	899	852	1.18545	0.843564	1.10891
7150112	TNFRSF1A	1060	1010	404	519	1.94605	0.513861	1.0495
2650519	HMGN4	1050	1010	901	910	1.10989	0.90099	1.0396
4540148	NDUFB9	1030	1010	683	616	1.63961	0.609901	1.0198
5090184	HEBP2	1030	1010	682	683	1.47877	0.676238	1.0198
130075	MRPS24	1000	1010	839	792	1.27525	0.784158	0.990099
6250129	DHRS7	996	1010	1060	1220	0.827869	1.20792	0.986139
4780114	GOLPH3	990	1010	834	884	1.14253	0.875248	0.980198
3190703	ARL8B	985	1010	1180	1140	0.885965	1.12871	0.975248
7320475	LSM3	953	1010	531	554	1.8231	0.548515	0.943564
6580138	PSMA7	950	1010	442	439	2.30068	0.434653	0.940594
940474	MGST3	902	1010	1210	1230	0.821138	1.21782	0.893069
510239	PAPPA	892	1010	57	89.5	11.2849	0.0886139	0.883168
3710086	NDUFA11	869	1010	782	716	1.41061	0.708911	0.860396
6770348	CKAP4	868	1010	482	433	2.33256	0.428713	0.859406
5960215	KHDRBS3	863	1010	1460	1480	0.682432	1.46535	0.854455
4390634	TNS3	730	1010	295	401	2.5187	0.39703	0.722772
4040360	BRI3	1150	1000	1260	1350	0.740741	1.35	1.15
5810164	CBS	1110	1000	441	489	2.04499	0.489	1.11
1410400	SGSM2	1060	1000	2440	2600	0.384615	2.6	1.06
4760382	UBE2V2	1040	1000	1150	1040	0.961538	1.04	1.04
4890398	HIGD2A	1030	1000	902	1010	0.990099	1.01	1.03
3850497	PWP1	1020	1000	875	753	1.32802	0.753	1.02
2340102	COPB2	971	1000	677	661	1.51286	0.661	0.971
1230706	M6PRBP1	961	1000	473	558	1.79211	0.558	0.961
6900020	UBE4B	908	1000	919	855	1.16959	0.855	0.908
3130670	COMMD3	1010	999	911	908	1.10022	0.908909	1.01101
6330152	KIAA0101	883	999	191	211	4.7346	0.211211	0.883884
4860296	BTBD10	976	998	1390	1350	0.739259	1.35271	0.977956
2370070	LARGE	919	998	394	460	2.16957	0.460922	0.920842
5960154	SPIRE1	1040	997	1720	1770	0.563277	1.77533	1.04313
3610634	C20ORF3	1040	996	1190	1110	0.897297	1.11446	1.04418
6590152	DLG7	970	996	63	82.5	12.0727	0.0828313	0.973896
2650370	GNPAT	910	996	655	693	1.43723	0.695783	0.913655
3420440	TAX1BP3	897	996	311	329	3.02736	0.330321	0.900602
460754	CDC25B	1130	995	667	588	1.69218	0.590955	1.13568
2760148	WDR75	999	994	650	641	1.5507	0.644869	1.00503
4010523	ITGB1BP1	894	993	883	939	1.05751	0.945619	0.900302
4640110	UBE2D3	1020	992	885	839	1.18236	0.845766	1.02823
3170747	ZNF503	972	992	70.9	64.7	15.3323	0.0652218	0.979839
290379	SFRS18	1030	991	1190	1150	0.861739	1.16044	1.03935
50133	LSM7	1070	990	669	655	1.51145	0.661616	1.08081
1430521	PHB2	941	990	587	562	1.76157	0.567677	0.950505
650070	UTP6	940	989	745	770	1.28442	0.778564	0.950455
4540112	RNF20	923	989	1120	1110	0.890991	1.12235	0.933266
4280156	CDCA7L	1080	988	279	274	3.60584	0.277328	1.09312
6020402	SRP68	1050	988	735	733	1.34789	0.741903	1.06275
1300743	TSC22D3	1370	987	1380	1210	0.815702	1.22594	1.38804
6580048	PA2G4	1070	987	359	328	3.00915	0.33232	1.08409
7100504	TTC4	974	987	809	796	1.23995	0.806484	0.986829
7570112	USP3	1020	986	770	748	1.31818	0.758621	1.03448
4830768	TSPAN6	885	986	875	939	1.05005	0.952333	0.897566
830576	RPP40	949	985	606	651	1.51306	0.660914	0.963452
1990707	C16ORF58	1090	984	1390	1430	0.688112	1.45325	1.10772
5260707	PTPN11	997	984	1250	1290	0.762791	1.31098	1.01321
5910110	RABGAP1	710	983	1280	1250	0.7864	1.27162	0.722279
6560187	PRELID1	962	982	531	452	2.17257	0.460285	0.979633
6900348	SBK1	877	982	3890	3920	0.25051	3.99185	0.893075
5390121	HOXB2	1100	981	24	25	39.24	0.0254842	1.1213
2490209	PPIL3	1020	981	832	949	1.03372	0.96738	1.03976
2060328	DPY30	942	980	1070	1040	0.942308	1.06122	0.961224
2320270	ZBTB33	862	979	1060	1100	0.89	1.1236	0.88049
7210136	ACVR1	1270	978	632	715	1.36783	0.731084	1.29857
3610414	TMEM126A	961	978	954	1000	0.978	1.02249	0.982618
5490142	EXOSC10	999	977	744	675	1.44741	0.69089	1.02252
3890070	YTHDF1	936	977	957	950	1.02842	0.972364	0.958035
5130195	MLH1	1020	976	744	685	1.42482	0.701844	1.04508
1450152	GPRASP2	939	976	1960	1940	0.503093	1.9877	0.96209
4490592	UBE2L6	1030	975	1460	1220	0.79918	1.25128	1.05641
3370521	PDIA6	949	975	435	451	2.16186	0.462564	0.973333
4050408	AGPAT5	934	975	1140	1200	0.8125	1.23077	0.957949
2690767	VRK1	967	974	196	208	4.68269	0.213552	0.992813
3780537	TACC2	975	973	1110	1280	0.760156	1.31552	1.00206
6130440	MRPS22	956	973	597	633	1.53712	0.650565	0.982528
3830246	C8ORF40	860	972	602	647	1.50232	0.665638	0.884774
7100544	PDGFC	763	972	174	272	3.57353	0.279835	0.784979
3850131	LRIG1	1140	971	885	883	1.09966	0.909372	1.17405
1770546	DNAJC7	861	971	636	537	1.80819	0.553038	0.886715
2360148	ABCE1	823	971	452	392	2.47704	0.403708	0.84758
5260239	XBP1	2080	970	290	303	3.20132	0.312371	2.14433
3780475	EIF2B4	984	970	854	877	1.10604	0.904124	1.01443
460524	MED20	1050	969	629	722	1.34211	0.745098	1.08359
5550474	CLTB	998	969	1600	1460	0.663699	1.50671	1.02993
290575	KIAA1542	1010	968	804	711	1.36146	0.734504	1.04339
4290735	MRPL45	996	968	523	530	1.82642	0.547521	1.02893
6400050	KIF1A	1110	967	8080	8610	0.112311	8.90383	1.14788
1570010	RGL1	870	967	1000	991	0.975782	1.02482	0.89969
6200280	ETF1	1120	966	639	587	1.64566	0.60766	1.15942
1340139	CEBPZ	960	966	751	779	1.24005	0.806418	0.993789
7210369	ZNF511	1140	965	405	383	2.51958	0.396891	1.18135
2810424	LDOC1L	808	965	2100	2000	0.4825	2.07254	0.837306
580280	ETFA	967	964	660	665	1.44962	0.689834	1.00311
670324	GLDC	934	962	763	819	1.1746	0.851351	0.970894
3190400	CEBPB	2930	961	335	337	2.85163	0.350676	3.04891
2070307	TSPYL1	891	961	1320	1380	0.696377	1.436	0.927159
4590577	C18ORF55	863	961	718	688	1.3968	0.715921	0.898023
6040403	C9ORF30	1030	960	972	907	1.05843	0.944792	1.07292
7100703	PDCD5	981	960	504	465	2.06452	0.484375	1.02188
430059	COPA	1170	959	925	973	0.985612	1.0146	1.22002
6620707	UQCC	1060	959	721	726	1.32094	0.757039	1.10532
5870021	PTMS	1070	958	910	847	1.13105	0.884134	1.11691
5720500	ALPK2	839	957	479	624	1.53365	0.652038	0.876698
580431	DYRK1A	1150	956	1210	1290	0.741085	1.34937	1.20293
1820041	NPTX2	927	956	3940	4380	0.218265	4.58159	0.969665
5130341	ZNF219	868	956	559	548	1.74453	0.573222	0.90795
6040408	CECR5	1080	955	896	750	1.27333	0.78534	1.13089
1660376	BAT2D1	850	955	792	929	1.02799	0.972775	0.890052
6420722	SDC2	914	954	128	142	6.71831	0.148847	0.958071
5090195	TNFRSF21	895	954	604	648	1.47222	0.679245	0.938155
4150725	PHKB	770	954	1140	1170	0.815385	1.22642	0.807128
1710088	ZFHX3	948	953	1110	1110	0.858559	1.16474	0.994753
1030379	IARS2	832	953	746	823	1.15796	0.863589	0.873033
7160731	FBXO5	869	952	262	265	3.59245	0.278361	0.912815
3850070	PANK2	814	952	565	630	1.51111	0.661765	0.855042
2710189	SSR1	922	951	733	751	1.26631	0.789695	0.969506
1850465	SEC11C	1030	950	1840	1810	0.524862	1.90526	1.08421
6590221	TMPO	843	950	130	120	7.91667	0.126316	0.887368
1190193	DDIT4	4730	949	432	414	2.29227	0.436249	4.98419
6760048	MT2A	1430	949	597	658	1.44225	0.693361	1.50685
7400553	DPF2	1020	949	760	649	1.46225	0.683878	1.07482
240687	KLC1	937	949	2590	2260	0.419912	2.38145	0.987355
3930368	GTPBP6	909	949	733	858	1.10606	0.90411	0.95785
6350452	APAF1	587	948	382	385	2.46234	0.406118	0.619198
4390201	EPB41L3	1000	947	4380	5160	0.183527	5.44879	1.05597
3460674	SRPK1	836	947	527	630	1.50317	0.665259	0.882788
3440139	SNX26	1110	946	3380	3070	0.308143	3.24524	1.17336
5890491	CXORF26	1070	946	1230	1190	0.794958	1.25793	1.13108
2710722	ARL6IP6	916	946	496	526	1.79848	0.556025	0.968288
2570685	ASPSCR1	1120	945	878	862	1.09629	0.912169	1.18519
5670603	RNF130	1050	945	390	404	2.33911	0.427513	1.11111
7380711	SAAL1	1070	944	400	400	2.36	0.423729	1.13347
4060537	G3BP2	892	943	1150	1030	0.915534	1.09226	0.945917
3780243	IFRD1	1200	942	1070	1130	0.833628	1.19958	1.27389
4230504	TMED7	953	942	904	1140	0.826316	1.21019	1.01168
5910537	C1ORF57	896	942	421	425	2.21647	0.451168	0.951168
5820750	MRPS27	1040	941	711	676	1.39201	0.718385	1.10521
5390255	RBM23	993	941	1060	1040	0.904808	1.10521	1.05526
6770403	ANXA7	897	941	687	740	1.27162	0.786397	0.953241
2470142	RPUSD4	1200	940	886	925	1.01622	0.984043	1.2766
1740280	ZBED5	901	940	1050	980	0.959184	1.04255	0.958511
3440463	TSR2	1070	939	784	827	1.13543	0.880724	1.13951
6270072	SFT2D1	955	939	803	809	1.16069	0.861555	1.01704
5390056	BCKDK	1060	938	1090	1120	0.8375	1.19403	1.13006
2070523	C11ORF59	1040	938	810	830	1.13012	0.884861	1.10874
6020095	LDB2	938	937	927	892	1.05045	0.951974	1.00107
7050372	TXNRD1	924	936	385	339	2.76106	0.362179	0.987179
5910653	P4HA1	830	936	574	666	1.40541	0.711538	0.886752
3990736	RARA	1110	935	928	825	1.13333	0.882353	1.18717
1660494	COPS7A	938	935	844	869	1.07595	0.929412	1.00321
5690593	RBP1	851	935	1280	1120	0.834821	1.19786	0.91016
4810465	SPG7	1010	934	1130	1150	0.812174	1.23126	1.08137
1660491	KLC1	855	934	4000	3640	0.256593	3.89722	0.915418
3290162	LAMP2	805	934	826	869	1.0748	0.930407	0.861884
630717	BTF3	935	933	521	567	1.6455	0.607717	1.00214
4010161	PRPF31	977	932	711	743	1.25437	0.79721	1.04828
7050673	HIC2	983	931	379	360	2.58611	0.386681	1.05585
7330541	ARPC4	905	930	666	632	1.47152	0.67957	0.973118
STD		2269.32	2262.92	2340.94	2337.82	0.967962	1.0331	1.00283
2260035	UPP1	1300	929	365	392	2.3699	0.421959	1.39935
3450452	TH1L	899	928	684	700	1.32571	0.75431	0.96875
3140474	GPR177	705	928	668	690	1.34493	0.743534	0.759698
990687	MRPL1	959	927	637	625	1.4832	0.674218	1.03452
780086	PECI	888	927	814	906	1.02318	0.977346	0.957929
7400253	E2F5	823	927	1230	1130	0.820354	1.21899	0.88781
6770468	CHKA	1180	926	1160	903	1.02547	0.975162	1.2743
3390376	MANBAL	987	926	875	812	1.14039	0.87689	1.06587
5820072	PPP1R15A	2500	925	1520	1280	0.722656	1.38378	2.7027
940220	RAB8A	857	925	504	564	1.64007	0.60973	0.926486
3940647	GPC2	767	925	2120	1930	0.479275	2.08649	0.829189
1820739	PIK4CA	1100	924	2060	1930	0.478756	2.08874	1.19048
4250497	UBAP2L	874	924	949	946	0.976744	1.02381	0.945887
1510224	NOLA2	840	923	571	539	1.71243	0.583965	0.910076
4280373	SVIL	755	923	402	473	1.95137	0.512459	0.817985
4640475	RAB2B	941	922	1350	1300	0.709231	1.40998	1.02061
5720364	CAPRIN1	899	922	1260	1290	0.714729	1.39913	0.975054
3940075	FAM82C	992	921	1320	1280	0.719531	1.38979	1.07709
2490037	PUM2	878	920	1020	1100	0.836364	1.19565	0.954348
2190376	ATAD2	903	919	141	153	6.00654	0.166485	0.98259
3130669	TMEM178	894	919	453	494	1.86032	0.537541	0.972797
6590386	FN3KRP	1020	918	744	744	1.23387	0.810458	1.11111
5490113	HIBADH	882	918	461	447	2.05369	0.486928	0.960784
2600242	CTCF	921	917	842	851	1.07756	0.928026	1.00436
5690743	COPS4	875	916	1010	987	0.928065	1.07751	0.95524
2940632	TFDP1	835	916	739	771	1.18807	0.841703	0.911572
6250066	DNAJB2	1150	915	1870	2010	0.455224	2.19672	1.25683
7550377	C6ORF85	760	915	1080	1080	0.847222	1.18033	0.830601
6130397	TBCE	1020	914	800	831	1.09988	0.90919	1.11597
1240546	RALGDS	909	914	1870	1650	0.553939	1.80525	0.99453
6290064	DFNA5	864	914	1790	1990	0.459296	2.17724	0.945295
6180497	FBXO11	975	913	1130	1130	0.807965	1.23768	1.06791
1340598	SLC25A39	959	913	1240	1210	0.754545	1.3253	1.05038
2450112	CDK5RAP3	873	913	1180	1090	0.837615	1.19387	0.956188
20746	SMARCAD1	776	913	775	819	1.11477	0.897043	0.849945
1570349	KIF5B	872	912	557	564	1.61702	0.618421	0.95614
540358	FLRT2	594	912	301	323	2.82353	0.354167	0.651316
3450164	EDF1	802	911	713	542	1.68081	0.594951	0.880351
630521	AFF3	1140	910	1010	1180	0.771186	1.2967	1.25275
6370520	MRPL33	788	910	442	486	1.87243	0.534066	0.865934
5270491	CDC16	961	909	915	776	1.17139	0.853685	1.05721
4280731	PDHA1	941	909	760	763	1.19135	0.839384	1.0352
1300735	SSU72	837	908	1050	954	0.951782	1.05066	0.921806
5700343	SSFA2	834	908	214	194	4.68041	0.213656	0.918502
610348	YIPF3	1150	907	981	988	0.918016	1.08931	1.26792
5870598	PELP1	942	907	845	721	1.25798	0.794928	1.03859
3310674	FBXW11	818	906	1130	1230	0.736585	1.35762	0.90287
5900520	ENOSF1	895	905	457	512	1.76758	0.565746	0.98895
4040296	STK39	854	905	996	1040	0.870192	1.14917	0.943646
1660138	ADFP	1010	904	401	387	2.33592	0.428097	1.11726
6480646	TYK2	940	904	1300	1230	0.734959	1.36062	1.03982
3940224	PARP6	1100	903	3910	3850	0.234545	4.26357	1.21816
4730632	HIST1H2BK	868	903	540	566	1.59541	0.6268	0.96124
5050390	CCT7	814	902	470	349	2.58453	0.386918	0.902439
70605	IDH1	668	902	1110	1080	0.835185	1.19734	0.740576
4210403	KCTD20	642	902	712	705	1.27943	0.781596	0.711752
6560450	39694	911	901	7460	7820	0.115217	8.67925	1.0111
4050139	ACTN4	889	901	353	380	2.37105	0.421754	0.986681
3170286	JMJD1C	1250	900	855	942	0.955414	1.04667	1.38889
2970706	COL11A1	718	900	627	766	1.17493	0.851111	0.797778
450603	CLCN7	1150	899	1290	1240	0.725	1.37931	1.2792
2940148	WDR61	849	899	792	798	1.12657	0.887653	0.944383
4260092	KLHL5	766	899	874	934	0.962527	1.03893	0.852058
1260370	NCBP1	883	898	505	462	1.94372	0.514477	0.983296
1110424	TMEM85	879	898	1090	1040	0.863462	1.15813	0.978842
940722	LAMA1	900	897	153	138	6.5	0.153846	1.00334
6040037	SEC31A	876	897	626	606	1.4802	0.675585	0.976589
7150008	EPHB1	876	897	1210	1140	0.786842	1.2709	0.976589
430189	LOC493869	1130	896	79.8	134	6.68657	0.149554	1.26116
6510484	ITFG1	832	896	1470	1620	0.553086	1.80804	0.928571
4890458	LOC130074	1010	895	796	744	1.20296	0.831285	1.12849
270068	CDCA7	935	895	218	262	3.41603	0.292737	1.04469
460048	CCDC59	1130	894	400	475	1.88211	0.53132	1.26398
5340593	ADNP	936	894	999	1210	0.738843	1.35347	1.04698
4560576	DIMT1L	989	892	589	644	1.38509	0.721973	1.10874
130328	DHX9	683	892	635	606	1.47195	0.679372	0.765695
6860392	ETS1	952	891	1	1	891	0.00112233	1.06846
2480551	QDPR	782	890	916	923	0.964247	1.03708	0.878652
2490170	RUVBL2	902	889	676	651	1.36559	0.732283	1.01462
7610646	C3ORF10	918	888	751	733	1.21146	0.82545	1.03378
4010102	RPAP3	824	888	846	746	1.19035	0.84009	0.927928
1030692	MRPL49	915	887	741	759	1.16864	0.855693	1.03157
5860253	NRIP1	965	886	320	348	2.54598	0.392777	1.08916
2070152	CMTM6	841	886	492	438	2.02283	0.494357	0.94921
2750484	C1ORF128	1110	885	1930	1620	0.546296	1.83051	1.25424
990424	CTBP1	923	885	1200	1120	0.790179	1.26554	1.04294
2000369	SC4MOL	321	885	1550	1510	0.586093	1.70621	0.362712
7560504	DBNL	925	884	650	679	1.30191	0.7681	1.04638
4480524	NUP37	868	884	196	198	4.46465	0.223982	0.9819
7610563	ZNF274	935	883	543	534	1.65356	0.604757	1.05889
1340167	BUB3	853	883	481	547	1.61426	0.619479	0.966025
20021	EIF4E2	706	883	298	289	3.05536	0.327293	0.799547
2190369	PRPF3	904	882	573	570	1.54737	0.646259	1.02494
6130546	PFKP	761	882	1670	1360	0.648529	1.54195	0.862812
4760615	ADI1	847	881	352	361	2.44044	0.409762	0.961407
2690356	IFP38	842	881	459	461	1.91106	0.523269	0.955732
2900370	C4ORF41	804	881	1040	974	0.904517	1.10556	0.912599
5870240	NHP2L1	969	880	1710	1540	0.571429	1.75	1.10114
3140142	CACHD1	801	880	868	966	0.910973	1.09773	0.910227
2370593	ZC3HC1	925	879	673	601	1.46256	0.683732	1.05233
630768	NAT10	860	879	727	652	1.34816	0.741752	0.978385
2480424	CAPNS1	814	879	587	520	1.69038	0.591581	0.926052
2600356	RDH11	826	878	1380	1300	0.675385	1.48064	0.940774
4040438	PRPS1	864	877	741	800	1.09625	0.912201	0.985177
6590730	TPM3	745	877	325	375	2.33867	0.427594	0.849487
5420767	RBM17	949	876	1450	1460	0.6	1.66667	1.08333
4860132	AGTPBP1	792	876	981	1040	0.842308	1.18721	0.90411
6270735	TUFM	986	875	847	810	1.08025	0.925714	1.12686
6650326	PRPF19	872	875	358	378	2.31481	0.432	0.996571
2070739	C1ORF144	785	875	406	474	1.84599	0.541714	0.897143
2510132	NUP85	822	874	428	444	1.96847	0.508009	0.940503
6450113	BRD7	758	874	785	708	1.23446	0.810069	0.867277
1070373	KBTBD2	1000	873	833	773	1.12937	0.885452	1.14548
2450615	TFAM	988	872	411	468	1.86325	0.536697	1.13303
6420129	BXDC1	977	872	356	321	2.71651	0.368119	1.12041
2070131	MRPL9	859	872	519	544	1.60294	0.623853	0.985092
6370056	FGFRL1	954	871	250	266	3.27444	0.305396	1.09529
5310296	USP1	928	870	355	349	2.49284	0.401149	1.06667
6760202	SMAD5	826	870	568	542	1.60517	0.622989	0.949425
4850070	FAM39DP	839	869	1380	1160	0.749138	1.33487	0.965478
5670050	ZDHHC8	764	869	1510	1730	0.502312	1.99079	0.879171
630161	C2ORF32	735	869	2300	2280	0.38114	2.62371	0.8458
4220445	MEA1	947	868	616	618	1.40453	0.711982	1.09101
6400292	RAB3GAP2	914	868	976	1010	0.859406	1.16359	1.053
4670356	PEPD	825	868	1010	1090	0.79633	1.25576	0.950461
1010193	TRAM2	750	868	347	406	2.13793	0.467742	0.864055
4920095	MTMR10	865	867	866	941	0.92136	1.08535	0.997693
2750148	ATP6V1E1	932	866	838	748	1.15775	0.863741	1.07621
2760255	ARHGEF18	928	866	970	1090	0.794495	1.25866	1.07159
2900524	DPH2	930	865	540	558	1.55018	0.645087	1.07514
620722	RBM4	816	865	432	503	1.71968	0.581503	0.943353
4060110	ALS2CR13	801	865	1350	1200	0.720833	1.38728	0.926012
1010341	YARS2	879	864	552	529	1.63327	0.612269	1.01736
3840670	CGNL1	679	864	91.1	150	5.76	0.173611	0.78588
3060736	AURKB	976	863	54.6	57.3	15.0611	0.0663963	1.13094
130743	TMEM209	800	863	330	379	2.27704	0.439166	0.926999
6520201	NET1	867	862	200	172	5.01163	0.199536	1.0058
7330307	ROD1	822	862	465	534	1.61423	0.61949	0.953596
2570669	LOC646723	650	862	38	30.6	28.1699	0.0354988	0.75406
3180725	TNPO2	900	861	1640	1550	0.555484	1.80023	1.0453
3710152	CUEDC2	756	861	784	873	0.986254	1.01394	0.878049
2470097	EIF3A	968	860	444	466	1.84549	0.54186	1.12558
2070634	CERK	871	860	755	721	1.19279	0.838372	1.01279
610682	ZNF83	810	860	920	905	0.950276	1.05233	0.94186
7570653	UIMC1	945	859	954	912	0.941886	1.0617	1.10012
630711	RPLP0	769	859	442	465	1.84731	0.541327	0.895227
4890228	GMNN	764	859	224	217	3.95853	0.252619	0.889406
1710369	CHN1	942	858	1100	1050	0.817143	1.22378	1.0979
5270356	TMBIM4	824	858	1020	1050	0.817143	1.22378	0.960373
3290142	CMAS	729	857	1290	1130	0.758407	1.31855	0.850642
5820475	POLB	875	856	1290	1090	0.785321	1.27336	1.0222
4010215	LITAF	767	856	1030	1030	0.831068	1.20327	0.896028
5220707	INA	756	856	5810	6060	0.141254	7.07944	0.883178
5290465	PLAGL2	956	855	530	499	1.71343	0.583626	1.11813
6900053	CSNK2A1	838	855	628	624	1.37019	0.729825	0.980117
4920376	MAPK3	800	855	1200	1240	0.689516	1.45029	0.935673
1690446	RHOC	865	854	317	390	2.18974	0.456674	1.01288
6420612	MRPL17	849	854	459	456	1.87281	0.533958	0.994145
6060717	AHCTF1	847	854	757	668	1.27844	0.782201	0.991803
4040497	XAB1	856	853	647	677	1.25997	0.793669	1.00352
2360358	USO1	800	853	762	703	1.21337	0.82415	0.937866
5570554	BSDC1	849	852	1140	1190	0.715966	1.39671	0.996479
580368	PSME1	813	852	987	996	0.855422	1.16901	0.954225
3610167	M6PR	702	852	309	275	3.09818	0.32277	0.823944
6510180	JOSD1	990	851	662	713	1.19355	0.837838	1.16334
2630671	KLHL7	610	851	888	952	0.893908	1.11868	0.716804
2640768	ZEB2	920	850	514	590	1.44068	0.694118	1.08235
6330630	NUDT3	838	850	1160	1010	0.841584	1.18824	0.985882
4120681	JMJD1B	703	850	663	583	1.45798	0.685882	0.827059
4570553	AK3	885	849	862	932	0.910944	1.09776	1.0424
4180601	IQGAP1	747	849	407	370	2.29459	0.435807	0.879859
6420278	SEMA6A	651	849	1960	1680	0.505357	1.9788	0.766784
6100626	BOC	1060	848	264	297	2.85522	0.350236	1.25
5340440	PRR14	907	848	959	946	0.896406	1.11557	1.06958
4390102	NFYC	853	848	685	606	1.39934	0.714623	1.0059
2230148	NUP133	759	848	919	917	0.924755	1.08137	0.895047
2490397	LRRC42	912	847	640	648	1.3071	0.765053	1.07674
610411	STOX2	794	847	1400	1680	0.504167	1.98347	0.937426
6270368	PNMA1	843	846	1300	1560	0.542308	1.84397	0.996454
3520286	SEPN1	939	845	960	948	0.89135	1.12189	1.11124
1820309	CAMSAP1L1	844	845	1590	1620	0.521605	1.91716	0.998817
2480372	EIF3J	790	845	655	641	1.31825	0.75858	0.934911
130619	NDUFA9	809	844	423	385	2.19221	0.456161	0.958531
6350446	BNIP3L	709	844	1310	1330	0.634586	1.57583	0.840047
6110551	SDCCAG10	880	843	568	544	1.54963	0.645314	1.04389
7150315	MRPL50	803	843	444	541	1.55823	0.641756	0.95255
830653	KIAA1598	768	843	2670	2250	0.374667	2.66904	0.911032
60072	CCNDBP1	833	842	754	718	1.1727	0.852732	0.989311
6220376	ELOVL6	760	842	219	199	4.23116	0.236342	0.902613
2630544	TACC3	856	841	105	115	7.31304	0.136742	1.01784
2340246	NEO1	950	840	677	795	1.0566	0.946429	1.13095
5810438	CAPRIN1	637	840	616	579	1.45078	0.689286	0.758333
3460397	FLOT1	943	839	1050	921	0.910966	1.09774	1.12396
6660114	FAM32A	882	839	771	671	1.25037	0.799762	1.05125
5220215	YEATS2	725	839	945	841	0.997622	1.00238	0.864124
3800010	ALKBH7	886	838	926	787	1.0648	0.939141	1.05728
2140092	BAMBI	858	838	164	189	4.43386	0.225537	1.02387
110408	CMBL	756	838	298	315	2.66032	0.375895	0.902148
620494	RRM2	732	838	79.3	83.5	10.0359	0.099642	0.873508
1850338	CYP26A1	1030	837	311	392	2.1352	0.468339	1.23059
610400	HNRNPA1	736	837	294	217	3.85714	0.259259	0.879331
4890035	KNTC1	778	836	132	177	4.72316	0.211722	0.930622
1660593	MGC3207	722	836	1400	1170	0.71453	1.39952	0.863636
6220291	ULK1	954	835	1030	1000	0.835	1.1976	1.14251
1400088	RNF19A	913	835	3530	3580	0.23324	4.28743	1.09341
6760128	NDEL1	1310	834	1630	1590	0.524528	1.90647	1.57074
670315	APLP1	783	834	2560	2450	0.340408	2.93765	0.938849
3060605	ASPM	744	834	101	123	6.78049	0.147482	0.892086
3930544	AMOT	692	834	229	203	4.10837	0.243405	0.829736
1770161	C14ORF106	770	833	99.7	115	7.24348	0.138055	0.92437
2900523	SMG1	753	833	892	851	0.978848	1.02161	0.903962
1770639	ASNSD1	888	832	962	884	0.941176	1.0625	1.06731
4880201	EIF6	874	832	378	357	2.33053	0.429087	1.05048
5860709	BCAP31	812	832	659	669	1.24365	0.804087	0.975962
3710189	RANGAP1	848	831	803	754	1.10212	0.907341	1.02046
360711	RBM42	831	831	514	611	1.36007	0.735259	1
4890598	TXNDC1	821	831	565	636	1.3066	0.765343	0.987966
1340682	PSMG1	931	830	425	440	1.88636	0.53012	1.12169
3840072	GNPDA1	850	830	328	329	2.5228	0.396386	1.0241
6370730	CLTA	829	830	620	550	1.50909	0.662651	0.998795
5570564	PQLC1	897	829	1890	1580	0.524684	1.90591	1.08203
6100743	ZFP90	653	829	1440	1460	0.567808	1.76116	0.787696
3130494	ARS2	809	828	467	485	1.70722	0.585749	0.977053
2600743	TST	746	828	522	578	1.43253	0.698068	0.900966
6560554	C17ORF70	856	827	1660	1490	0.555034	1.80169	1.03507
2060414	RCOR3	918	826	1110	1120	0.7375	1.35593	1.11138
240025	CENPB	848	826	1100	1330	0.621053	1.61017	1.02663
840348	ARHGAP1	812	826	665	628	1.31529	0.760291	0.983051
6020327	VAMP3	630	826	350	384	2.15104	0.464891	0.762712
4050273	ZFYVE20	912	825	1500	1460	0.565068	1.7697	1.10545
5340646	CSTF2	788	825	294	299	2.7592	0.362424	0.955152
2760484	DSE	625	825	126	165	5	0.2	0.757576
5910022	C3ORF21	859	824	614	580	1.42069	0.703883	1.04248
5810184	SYTL2	720	824	145	147	5.60544	0.178398	0.873786
4150202	SIN3A	890	823	534	456	1.80482	0.55407	1.08141
1400747	MRPS15	821	823	462	471	1.74735	0.572296	0.99757
5860220	ENOPH1	907	822	868	927	0.886731	1.12774	1.10341
4560474	C6ORF72	784	822	852	845	0.972781	1.02798	0.953771
380561	TBC1D14	762	822	1100	1010	0.813861	1.22871	0.927007
4040386	BET1L	1100	821	510	560	1.46607	0.682095	1.33983
160017	CKS2	844	821	146	167	4.91617	0.20341	1.02801
4490719	TAF10	790	821	621	669	1.2272	0.81486	0.962241
2970554	YME1L1	676	821	381	354	2.31921	0.431181	0.823386
3710632	SSR4	947	820	707	734	1.11717	0.895122	1.15488
610471	CLPTM1L	785	820	719	706	1.16147	0.860976	0.957317
2140253	CLK1	804	819	1090	1010	0.810891	1.23321	0.981685
4540075	GOLGA7	799	819	1080	1040	0.7875	1.26984	0.97558
6200128	KIAA1191	730	819	849	776	1.05541	0.947497	0.891331
4050768	PSMG1	807	818	295	335	2.44179	0.409535	0.986553
6660437	ACAA2	777	818	322	363	2.25344	0.443765	0.949878
7100368	C1ORF123	669	818	693	757	1.08058	0.925428	0.817848
3850452	KIAA1754	885	817	59.2	53.3	15.3283	0.0652387	1.08323
290411	RAP2A	804	817	2250	2240	0.364732	2.74174	0.984088
5310382	PELO	798	816	403	434	1.88018	0.531863	0.977941
1570204	INTS3	765	816	838	781	1.04481	0.957108	0.9375
160537	GSTA4	755	816	2210	2100	0.388571	2.57353	0.925245
7550349	SPAG5	749	815	114	128	6.36719	0.157055	0.919018
3520463	TMEM41B	725	815	965	977	0.834186	1.19877	0.889571
580743	EBAG9	795	814	942	924	0.880952	1.13514	0.976658
7000431	PFDN1	747	814	528	479	1.69937	0.588452	0.91769
4290465	C16ORF75	718	814	133	160	5.0875	0.19656	0.882064
150543	LIMA1	695	814	433	479	1.69937	0.588452	0.853808
5270762	SULF2	733	813	361	437	1.86041	0.537515	0.901599
160682	SF3B3	711	813	516	519	1.56647	0.638376	0.874539
630491	DDX50	880	812	509	485	1.67423	0.597291	1.08374
1740471	PSMF1	855	812	1330	1440	0.563889	1.7734	1.05296
20373	PTTG1	789	812	130	136	5.97059	0.167488	0.971675
840612	HMMR	760	812	29.8	26.5	30.6415	0.0326355	0.935961
6590113	NUDT11	760	811	1590	1710	0.474269	2.10851	0.937115
2350674	SCAMP1	701	811	2470	2530	0.320553	3.11961	0.864365
4070491	TOMM70A	778	810	888	856	0.946262	1.05679	0.960494
2480682	HOXA2	770	810	1	1	810	0.00123457	0.950617
1710653	RANBP9	877	809	722	695	1.16403	0.859085	1.08405
5960021	MKLN1	848	809	801	717	1.12831	0.886279	1.04821
6250673	EIF5A	771	809	340	314	2.57643	0.388133	0.953028
5670040	SDF2L1	1320	808	391	382	2.11518	0.472772	1.63366
1470070	LIPA	636	808	489	587	1.37649	0.726485	0.787129
5550553	CRELD2	903	807	977	934	0.864026	1.15737	1.11896
6900242	GTF2H5	775	807	608	685	1.1781	0.848823	0.960347
7650564	PPP1R11	764	807	1580	1830	0.440984	2.26766	0.946716
3800292	HDAC3	780	806	613	686	1.17493	0.851117	0.967742
4560341	PRKRA	719	806	1240	1100	0.732727	1.36476	0.89206
4590678	PHF21A	846	805	571	666	1.20871	0.827329	1.05093
240468	ANTXR2	821	805	234	308	2.61364	0.382609	1.01988
160059	CRLS1	742	805	804	825	0.975758	1.02484	0.921739
5360327	PDIA4	933	804	458	483	1.6646	0.600746	1.16045
3870768	PSMA4	779	804	446	456	1.76316	0.567164	0.968905
1410372	PCCB	740	804	461	531	1.51412	0.660448	0.920398
1340008	PALM	778	803	1900	1920	0.418229	2.39103	0.968867
2630215	NCOA6	757	803	1130	1180	0.680508	1.46949	0.942715
5860309	FLRT3	645	803	490	520	1.54423	0.647572	0.803238
2900682	FEM1A	899	802	668	638	1.25705	0.795511	1.12095
7650504	PPP2R4	757	802	610	627	1.27911	0.781796	0.94389
6110255	SFRS14	702	802	1400	1430	0.560839	1.78304	0.875312
290189	XPC	688	802	385	481	1.66736	0.599751	0.857855
1940113	BSG	858	801	561	598	1.33946	0.746567	1.07116
3830672	VPS4B	721	801	630	649	1.23421	0.810237	0.900125
4150164	GPT2	916	800	493	537	1.48976	0.67125	1.145
3120086	KCNQ2	816	800	417	480	1.66667	0.6	1.02
5890010	LYK5	798	800	936	913	0.876232	1.14125	0.9975
2690161	HIP2	751	800	901	1020	0.784314	1.275	0.93875
1030131	HSPA5	1260	799	1070	1150	0.694783	1.4393	1.57697
5310131	RNASET2	795	799	1110	1290	0.61938	1.61452	0.994994
6650563	TRAPPC4	760	799	882	798	1.00125	0.998748	0.951189
2000139	RSPRY1	763	798	741	838	0.952267	1.05013	0.95614
1690201	RAB1A	749	798	717	787	1.01398	0.986216	0.938596
2070437	PSME3	714	798	790	751	1.06258	0.941103	0.894737
1820630	CTPS2	711	798	719	691	1.15485	0.865915	0.890977
4210450	MEX3B	590	798	759	754	1.05836	0.944862	0.739348
4280750	TSPAN4	855	797	436	469	1.69936	0.588457	1.07277
7610168	LOC285636	783	796	802	760	1.04737	0.954774	0.983668
7650324	DAP3	731	796	532	484	1.64463	0.60804	0.918342
6770440	C9ORF46	724	796	360	445	1.78876	0.559045	0.909548
7040088	UGP2	713	795	732	801	0.992509	1.00755	0.896855
1090452	GNG2	612	795	3590	3490	0.227794	4.38994	0.769811
110487	POLR3C	881	794	441	441	1.80045	0.555416	1.10957
2260243	MRPL39	832	794	472	518	1.53282	0.652393	1.04786
4610338	STAMBP	826	794	636	655	1.21221	0.824937	1.0403
4210326	MRPS30	945	793	466	407	1.9484	0.513241	1.19168
2450730	HJURP	752	793	57.3	56.5	14.0354	0.0712484	0.948298
540445	PPHLN1	838	792	649	612	1.29412	0.772727	1.05808
6130739	TOMM34	831	792	564	569	1.39192	0.718434	1.04924
7330615	C12ORF24	802	792	665	681	1.163	0.859848	1.01263
6420368	EHBP1	852	791	1710	1780	0.444382	2.25032	1.07712
2470521	FZD2	754	791	1	1	791	0.00126422	0.953224
6370093	PIP5K2B	471	791	1500	1240	0.637903	1.56764	0.595449
3370474	CALR	913	790	521	524	1.50763	0.663291	1.1557
5670605	WBSCR22	759	790	720	568	1.39085	0.718987	0.960759
5130767	SMAD3	743	790	261	251	3.14741	0.317722	0.940506
610082	GDI1	861	789	1990	2050	0.384878	2.59823	1.09125
6480647	ARFIP1	707	789	584	588	1.34184	0.745247	0.896071
7570458	ABI2	851	788	484	537	1.46741	0.681472	1.07995
3360382	AK2	761	788	375	449	1.75501	0.569797	0.965736
7380364	ASCC1	767	787	938	915	0.860109	1.16264	0.974587
1780408	NSL1	745	787	629	720	1.09306	0.914867	0.946633
6280332	GALNT11	683	787	1780	1680	0.468452	2.13469	0.867853
3170487	CDCA8	657	787	38.3	57.7	13.6395	0.0733164	0.834816
2230184	GSPT2	883	786	1350	1300	0.604615	1.65394	1.12341
4780411	RUSC1	879	786	1710	1450	0.542069	1.84478	1.11832
7330181	IRX3	772	785	1630	1660	0.472892	2.11465	0.983439
5810008	BLMH	728	785	445	356	2.20506	0.453503	0.927389
4590364	EI24	658	785	628	561	1.39929	0.71465	0.838217
3940356	MAP2K1IP1	884	784	776	940	0.834043	1.19898	1.12755
6100670	LOC389541	720	784	686	582	1.34708	0.742347	0.918367
540288	GPR177	706	784	185	273	2.87179	0.348214	0.90051
[truncated: 11,572 more rows]
