# Supplementary material for: Identification by Automated Screening of a Small Molecule that Selectively Eliminates Neural Stem Cells Derived from hESCs but Not Dopamine Neurons
Source: PLoS One. 2009 Sep 23;4(9):e7155. doi: 10.1371/journal.pone.0007155 (PMC2743191; doi:10.1371/journal.pone.0007155)
Supplement: Table S4 — Controls for 96 well plates (0.03 MB XLS) [file pone.0007155.s004.xls]

## Sheet: Sheet1
	Table S4: Controls for Figure 2
	DMSO Controls for each plate:
		ESC1	NSC1	ESC2	NSC2	ESC3	NSC3	ESC4	NSC4	ESC5	NSC5	ESC6	NSC6	ESC7	NSC7
	A1	1755	17723	1634	17785	1942	17330	2234	17021	1126	16840	1909	17436	1746	16512
	A12	1819	17126	2340	17941	802	17847	1891	16178	1962	16333	2150	17207	1491	16961
	B1	1652	16896	2321	17264	1914	17272	1660	16886	1621	17076	2140	17297	1798	16092
	B12	2265	16849	1828	17337	1279	16886	1175	16832	1519	17623	1725	16133	1162	17121
	C1	2968	17930	2771	17180	2327	16561	2175	17676	1720	17088	1491	18154	1368	17554
	C12	1596	18111	1931	18188	1633	17291	1345	17600	1880	17711	2257	17334	1736	17832
	D1	2571	18941	2079	18180	1753	17133	1545	17827	1990	17167	1912	17394	1886	16530
	D12	2698	17098	1728	17455	1955	17477	2040	17008	1355	17211	659	17928	1576	17600
	E1	1331	17236	2524	18065	2410	17411	2689	17556	4129	18612	1937	17991	1634	17350
	E12	1488	17156	1510	17129	2085	17933	1515	16785	1276	16707	1523	17549	1058	17119
	F1	2760	19031	1873	15669	2653	17667	2598	16789	1954	17117	1951	18196	1777	17304
	F12	1913	18164	1893	18149	1999	16854	1505	16965	1984	16767	1180	17331	1423	16586
	G1	2595	18380	2022	17411	1284	17306	2166	18076	1981	16072	1448	17774	1762	17850
	G12	2110	17684	2329	17037	1424	16918	1681	16874	2332	16995	1458	16675	1757	16277
	H1	1543	18344	1642	16255	1424	16553	2225	16460	2044	16695	2172	17446	1882	17522
	H12	1511	17393	1660	17680	1765	16830	1371	15875	2145	15690	1808	17286	1690	14871
		ESC8	NSC8	ESC9	NSC9	ESC10	NSC10	ESC11	NSC11	ESC12	NSC12	ESC13	NSC13	ESC14	NSC14
	A1	1629	16451	2165	17040	2568	16904	2250	16569	1623	15544	1915	17013	2488	16986
	A12	1435	15916	2201	17153	2164	14263	1632	16580	1829	14886	2083	14879	1510	14152
	B1	2661	18197	2119	17699	1943	17220	2046	16469	2136	14755	2741	16623	1765	16036
	B12	1224	15837	2140	16368	2001	15533	1862	15520	1594	15440	1854	15777	1213	14601
	C1	2255	17544	2286	16897	2433	16624	1532	16337	1500	16253	1410	16274	1663	15426
	C12	1164	16207	1490	15922	2053	16418	1325	15372	1488	15393	1389	15725	1012	15186
	D1	1783	18506	1934	16920	2914	16824	2588	16526	2393	15542	1756	16329	1908	15559
	D12	1497	16373	2995	16522	2076	16456	1750	16777	1823	15146	1101	15851	1540	15341
	E1	1767	17880	2684	17171	3597	16801	1920	16408	2029	14992	2587	16585	1796	15244
	E12	1716	16023	2560	17316	2139	15907	2305	15340	1495	15102	1254	15455	1128	13943
	F1	2301	17812	1116	16289	2971	16703	2394	17086	1958	15093	2995	16361	1585	15908
	F12	1441	16072	1956	15945	2098	14804	1648	14419	1386	14595	1908	15955	1449	14708
	G1	2118	17419	1655	16754	1991	16350	2256	16527	1585	14233	2064	16222	1873	15104
	G12	1596	15972	2737	14998	2581	15384	2092	15843	1410	14176	1732	16017	1190	15133
	H1	3602	16193	1467	16389	1726	16488	2891	16010	1759	15721	2249	16596	1497	16006
	H12	1640	15815	1606	15261	2122	16233	2254	15247	2457	15708	2168	16110	1417	15635
		E1	N1	E2	N2	E3	N3	E4	N4	E5	N5	E6	N6	E7	N7
	Control avg	2035.94	17753.9	2005.31	17420.3	1790.56	17204.3	1863.44	17025.5	1938.62	16981.5	1732.5	17445.7	1609.12	16942.6
	Stdev	534.534	695.136	361.1	699.137	476.221	416.549	456.136	596.651	672.394	676.624	422.964	526.828	246.806	777.039
		E8	N8	E9	N9	E10	N10	E11	N11	E12	N12	E13	N13	E14	N14
	Control avg	1864.31	16763.6	2069.44	16540.2	2336.06	16182	2046.56	16064.4	1779.06	15161.2	1950.38	16110.8	1564.62	15310.5
	Stdev	615.173	948.354	518.13	737.215	484.906	809.575	414.588	711.013	336.005	557.249	529.149	516.013	362.652	754.027
	P value for Amidarone-10uM			<0.001
	Figure 3
	10uM ESC vs DA			0.0013
	10uM NSC vs DA			<0.001
	10uM ESC vs NSC			<0.001
