# Supplementary material for: Identification by Automated Screening of a Small Molecule that Selectively Eliminates Neural Stem Cells Derived from hESCs but Not Dopamine Neurons
Source: PLoS One. 2009 Sep 23;4(9):e7155. doi: 10.1371/journal.pone.0007155 (PMC2743191; doi:10.1371/journal.pone.0007155)
Supplement: Table S5 — Transcription factors differentially expressed in NSC with and without amiodarone treatment (0.03 MB XLS) [file pone.0007155.s005.xls]

## Sheet: Sheet1
Table S5. Transcription factors that are differentially expressed in NSCs with and without amiodarone HCl treatment
Category	Gene	Treated NSC	Untreated	Treated Neuron	Untreated
			NSC		Neuron
Gene expression higher in treated NSCs	EGR1	3100	339	109	128
	DDIT3	2270	269	170	145
	FOS	1160	123	1980	1410
	FOSB	174	1	346	185
	TAF5L	77.4	1	17.5	17.6
	RELB	53.6	1	31.9	27.6
	IRF1	38.9	1	1	1
	KLF10	38.1	1	1	1
	MEF2C	33.1	1	49.8	48.2
	ZNF197	32.8	1	5.1	1
	THRB	32.7	1	1	23.1
	TEF	32.4	1	23.5	1
	CREBL1	32.2	1	1	1
	HIRA	31.5	1	24.2	27.4
	MYEF2	30.6	1	25.3	1
	NR4A2	30.4	1	212	183
	L3MBTL	27.5	1	97.7	99.9
Gene expression higher in NSC compared to neuron	DLX1	1550	1650	1	1
	ETS1	952	891	1	1
	HOXA2	770	810	1	1
	ETV4	672	688	1	1
	TEAD4	235	213	1	1
	HOXB4	198	251	1	1
	HOXB3	186	214	1	1
	MEOX1	178	180	1	1
	EGR2	155	44.1	1	1
	FOXL2	120	115	1	1
	TGIF1	117	62.8	1	1
	ELF4	103	116	1	1
	PAX8	98.9	104	1	1
	PRDM1	94.7	94.5	1	1
	ELK3	89.9	90.9	1	1
	TEAD3	87	75.1	1	1
	E2F8	82.7	73.8	1	1
	SALL1	80.9	103	1	17
	FOXD1	79.7	99.7	1	1
	PBX2	70.8	52.2	1	11.3
	HOXD3	70.2	64.1	1	1
	PRRX2	67.5	80.8	1	22.7
	STAT6	55.8	58	1	17.1
	DLX2	54.3	34.1	1	1
	AFF1	50.8	58.1	1	24.9
	HOXB5	49.9	69.2	1	1
	EN1	48.7	59.3	1	1
	ZSCAN29	47.6	42.6	1	1
	TBX2	46.9	29.3	1	1
	GATA2	46.2	45.8	1	1
	HOXB2	1100	981	24	25
	NR1D2	44.9	30.7	1	1
	NRK	43.8	42.3	1	1
	GLI2	227	239	5.2	27.5
	RUNX1	43.3	48.6	1	1
	LHX8	42.9	28.5	1	1
	MSX2	41.9	39.4	1	1
	HCLS1	40	23.1	1	1
	ELK4	39.3	26	1	1
	FOXF2	39.3	29.7	1	1
	IRF1	38.9	1	1	1
	KLF10	38.1	1	1	1
	HEY2	37.9	28.3	1	1
	ZNF274	37.8	31.1	1	1
	FOXA2	36.8	27.2	1	1
	ASCL2	36	32.9	1	1
	TAF13	35.2	35.8	1	1
	ETV1	34.4	39.5	1	1
	HOXA13	33.2	35.9	1	1
	ERG	32.9	24.9	1	17.5
	NFATC4	32.8	34.5	1	1
	THRB	32.7	1	1	23.1
	NFATC3	32.4	44.7	1	1
	SIX4	185	193	5.7	1
	CREBL1	32.2	1	1	1
	ZNF367	30.9	25.9	1	1
	ELF5	30.8	30.2	1	1
	HOXB1	30.6	23.7	1	1
	EGR1	3100	339	109	128
	ZNF85	93.8	57.2	5.6	32.3
	E2F7	711	556	43	65.5
	DDIT3	2270	269	170	145
	HMGB2	2170	2000	163	163
	NFKB2	68	62.6	5.3	24.6
	NR2C2	65.3	60.9	5.7	23.2
	TP53	267	279	23.7	26.3
	ARID3A	2200	2480	201	208
	FLI1	123	147	11.3	26.8
	FOXM1	287	271	27.7	32.2
	E2F2	635	545	63.2	60.9
	FOXC1	327	393	32.6	25.7
